# Supplementary material for: Altered transcriptional regulatory proteins in glioblastoma and YBX1 as a potential regulator of tumor invasion
Source: PubMed Central journal article supplement (PMC6662741; doi:10.1038/s41598-019-47360-9), 2019-07-29
Supplement: 41598_2019_47360_MOESM1_ESM.pdf [file 41598_2019_47360_MOESM1_ESM.pdf]

**Altered transcriptional regulatory proteins in glioblastoma and YBX1 as a potential regulator of tumor invasion**

*Manoj Kumar Gupta<sup>1,2</sup>, Ravindra Varma Polisetty<sup>3</sup>, Rakesh Sharma<sup>1</sup>, Raksha A Ganesh<sup>4</sup>, Harsha Gowda<sup>1</sup>, Aniruddh K Purohit<sup>5</sup>, Praveen Ankathi<sup>5</sup>, Komal Prasad<sup>6</sup>, Kiran Mariswamappa<sup>6</sup>, Akhila Lakshmikantha<sup>6</sup>, Megha S Uppin<sup>5</sup>, Challa Sundaram<sup>5</sup>, Poonam Gautam<sup>7#</sup>, Ravi Sirdeshmukh<sup>1,2,4#</sup>*

<sup>1</sup>*Institute of Bioinformatics, International Tech Park, Bangalore-560066, India;*  
<sup>2</sup>*Manipal Academy of Higher Education, Madhav Nagar, Manipal-576104, India;*  
<sup>3</sup>*Department of Biochemistry, Sri Venkateswara College, University of Delhi, New Delhi-110021, India;* <sup>4</sup>*Neuro-Oncology, Mazumdar Shaw Center for Translational Research, Bangalore-560099, India;* <sup>5</sup>*Nizam's Institute of Medical Sciences, Hyderabad-500082, India;* <sup>6</sup>*Mazumdar Shaw Medical Center, Narayana Health, Bangalore-560099, India;* <sup>7</sup>*ICMR-National Institute of Pathology, Safdarjung Hospital Campus, New Delhi-110029, India*

**Running title:** Glioma Nuclear Proteome Analysis

**# Corresponding authors**

*Dr. Ravi Sirdeshmukh*

*Institute of Bioinformatics, International Tech Park,  
Bangalore-560066, India*

*Phone: 0091-9885090963*

*E-mail: ravisirdeshmukh@gmail.com; ravi@ibioinformatics.org*

AND

*Dr. Poonam Gautam*

*ICMR-National Institute of Pathology,  
Safdarjung Hospital Campus,  
New Delhi-110029, India*

*Phone: 0091-8800845323*

*E-mail: gautam.poonam@gmail.com; poonamgautam.nip@gov.in*

## SUPPLEMENTARY FILE LEGENDS

### **Supplementary Table S1:**

**Number of stromal/immune cell signature proteins present in the proteomics datasets.** The stromal and immune cell signatures determined through the application of the ESTIMATE tool to TCGA gene expression data for GBM and other cancers, were taken from the study of *Yoshihara, et al., 2013* (Ref. 11). We used the same set of pooled clinical specimens of different grades of gliomas to isolate membrane and nuclear sub-cellular fractions and profiled proteins in those fractions by mass spectrometry [membrane proteins (Ref. 7-9) or nuclear proteins (present study)]. The membrane and nuclear proteins identified by us from different grades of glioma specimens were separately compared for their overlap with the stromal/immune cell signature genes. A comparison was carried out between these overlapping proteins identified in each grade and the total proteins identified in the respective grades. The comparison was done at protein level, the peptide level as well as at the level of peptide mass spectral signals for the peptides (PSMs). The numbers in the Table correspond to total proteins identified in a sample, total number of peptides for all proteins identified and total number of mass spectrum matches/signals (PSMs) identified for all peptides of all proteins. The numbers given for the nuclear protein dataset for different grades are identical because all those samples were run in one multiplexed mass spectrometry run and the protein identifications are applicable to each of the grades (see Materials and Method section).

### **Supplementary Table S2:**

**Non-redundant list of differentially expressed proteins (DEPs) identified in different grades of astrocytomas.** The list contains a total of 244 non-redundant DEPs derived from 162 DEPs identified from Grade II, 131 DEPs from Grade III and 147 DEPs from Grade IV GBM. Majority of them (n=207) were identified with  $\geq 2$  unique peptides and  $\geq 1.5$  fold change. The number of peptide/PSMs information, molecular function, biological process and cellular localization for each of the proteins identified are shown. The grade-wise quantitation details of DEPs in each grade (Gr II, III and IV) is shown in **Supplementary Tables S3, S4 and S5**,

respectively. Data on mRNA level expression from literature (as mentioned in the Results section) is shown in Columns I, M and Q and supports many protein members being concordant in their expression with corresponding mRNAs. DEPs with transcription regulatory function have been marked in column V.

**Supplementary Table S3:**

**Differentially expressed proteins in Grade II astrocytoma.** A total of 162 nuclear proteins ( $\geq 1.5$  fold change) were identified after applying quality control filters as detailed in Methods section. The Table describes the total number of proteins and peptides identified in replicate mass spectrometry runs along with their quantity values.

**Supplementary Table S4:**

**Differentially expressed proteins in Grade III astrocytoma.** A total of 131 nuclear proteins ( $\geq 1.5$  fold change) were identified after applying quality control filters as detailed in Methods section. The Table describes the total number of proteins and peptides identified in replicate mass spectrometry runs along with their quantity values.

**Supplementary Table S5:**

**Differentially expressed proteins in Grade IV astrocytoma (GBM).** A total of 147 nuclear proteins ( $\geq 1.5$  fold change) were identified after applying quality control filters as detailed in Methods section. The Table describes the total number of proteins and peptides identified in replicate mass spectrometry runs along with their quantity values.

**Supplementary Table S6:**

**Ingenuity Pathway Analysis of the non-redundant list of differentially expressed nuclear proteins (n=244) identified in different grades of astrocytomas.** The proteins associated with major canonical pathways (A), molecular and cellular functions (B) and networks and processes (C), are listed with their p-value. The Table shows only top 5 canonical pathways, molecular and cellular functions, and networks.

In (C), proteins present in the dataset mapping to respective networks are shown in bold.

**Supplementary Table S7:**

**Top 5 significant Networks and processes identified in nuclear protein analysis of different grades of astrocytoma when analyzed separately using Ingenuity Pathway Analysis.**

**Supplementary Table S8:**

**Proteins identified to be differentially expressed in all the grades studied - Grade II, III and IV.** A total of 53 proteins identified were found common to all the grades. This protein subset has been derived from **Supplementary Table S2**.

**Supplementary Table S9:**

**Immunohistochemistry on tissue microarray for six differentially expressed proteins, NUCKS1, SMARCA5, PARP1, PTBP1, HMGB2, and NFIB, identified by quantitative mass spectrometric analysis.** Immunohistochemistry was performed using commercially available tissue microarrays (US BioMax) consisting of 4 control subjects, 13 diffuse astrocytomas (Grade II), 11 anaplastic astrocytomas (Grade III), and 27 glioblastoma (Grade IV) patients samples. Scoring criteria used were based on both staining intensities and distributions. Scores 0, +1, +2 and +3 indicate negative, low, medium and strong staining, respectively. The distribution of staining of cancer cells was scored as 0 (less than 5% of cells staining), 1+ (5–30% of cell staining), 2+ (31–60% of cells staining) and 3+ (greater than 60% of cells staining). TMA slides were evaluated independently by two neuropathologists.

**Supplementary Table S10:**

**List of 61 concordant mRNA and protein target entities present in the transcription interaction network and their microRNA regulators.** The miRNA interaction were identified, as per pipeline shown in **Figure 5A** and described in the Methods, for mRNA and protein entities present in the transcription network as shown in **Figure 4**. Each of the miRNA-target interaction was supported by at least one PubMed ID.

**Supplementary Table S11:**

**Immunohistochemistry on tissue microarrays of GBM for YBX1 and its interacting proteins, EGFR, MAPK1, CD44, TNC, MMP13 and SOX2 identified by protein-protein network analysis.** Immunohistochemistry was performed using in-house prepared tissue microarrays consisting of 4 control subjects and 18 glioblastoma (Grade IV) patient samples. Scoring criteria used were based on both staining intensities and distributions. TMA slides were evaluated independently by two neuropathologists. The distribution of staining of cancer cells was scored as 0 (less than 5% of cells staining), 1+ (5–30% of cell staining), 2+ (31–60% of cells staining) and 3+ (greater than 60% of cells staining). Scores 0, +1, +2 and +3 indicate negative, low, medium and strong staining respectively.

**Supplementary Table S12:**

**List of selected differentially expressed transcription regulatory proteins identified in the study and their role in tumorigenesis.**

**Gupta et al., 2019. Altered transcriptional regulatory proteins in glioblastoma and YBX1 as a potential regulator of tumor invasion**

**Supplementary Table 1: Number of stromal/immune cell signature proteins present in the proteomics datasets.** The stromal and immune cell signatures determined through the application of the ESTIMATE tool to TCGA gene expression data for GBM and other cancers, were taken from the study of *Yoshihara, et al., 2013* (Ref. 11). We used the same set of pooled clinical specimens of different grades of gliomas to isolate membrane and nuclear sub-cellular fractions and profiled proteins in those fractions by mass spectrometry [membrane proteins (Ref. 7-9) or nuclear proteins (present study)]. The membrane and nuclear proteins identified by us from different grades of glioma specimens were separately compared for their overlap with the stromal/immune cell signature genes. A comparison was carried out between these overlapping proteins identified in each grade and the total proteins identified in the respective grades. The comparison was done at protein level, the peptide level as well as at the level of peptide mass spectral signals for the peptides (PSMs). The numbers in the Table correspond to total proteins identified in a sample, total number of peptides for all proteins identified and total number of mass spectrum matches/signals (PSMs) identified for all peptides of all proteins. The numbers given for the nuclear protein dataset for different grades are identical because all those samples were run in one multiplexed mass spectrometry run and the protein identifications are applicable to each of the grades (see Materials and Method section).

| Protein Level      |                |                                 |                                |
|--------------------|----------------|---------------------------------|--------------------------------|
| Specimen - dataset | Total proteins | Stromal Cell Signature proteins | Immune Cell Signature proteins |
| GBM - Nuclear      | 743            | 1                               | 3                              |
| GrIII - Nuclear    |                |                                 |                                |
| GrII - Nuclear     |                |                                 |                                |
| GBM - Membrane     | 1834           | 12                              | 16                             |
| GrIII - Membrane   | 2642           | 9                               | 19                             |
| GrII - Membrane    | 2803           | 6                               | 17                             |
| Peptide Level      |                |                                 |                                |
| Specimen - dataset | Total peptides | Stromal Cell Signature peptides | Immune Cell Signature peptides |
| GBM - Nuclear      | 2409           | 1                               | 4                              |
| GrIII - Nuclear    |                |                                 |                                |
| GrII - Nuclear     |                |                                 |                                |
| GBM - Membrane     | 7596           | 34                              | 84                             |
| GrIII - Membrane   | 9393           | 20                              | 45                             |
| GrII - Membrane    | 9352           | 20                              | 48                             |
| PSM Level          |                |                                 |                                |
| Specimen - dataset | Total PSMs     | Stromal Cell Signature PSMs     | Immune Cell Signature PSMs     |
| GBM - Nuclear      | 5623           | 19                              | 5                              |
| GrIII - Nuclear    |                |                                 |                                |
| GrII - Nuclear     |                |                                 |                                |
| GBM - Membrane     | 21408          | 44                              | 213                            |
| GrIII - Membrane   | 22991          | 31                              | 69                             |
| GrII - Membrane    | 23688          | 35                              | 105                            |



|           |                |           |        |                                                                                |    |    |       |      |    |    |       |       |       |      |       |       |      |                                  |                                                                              |                                                                              |                                           |         |   |
|-----------|----------------|-----------|--------|--------------------------------------------------------------------------------|----|----|-------|------|----|----|-------|-------|-------|------|-------|-------|------|----------------------------------|------------------------------------------------------------------------------|------------------------------------------------------------------------------|-------------------------------------------|---------|---|
| 344925834 | NP_001230710.1 | FAM213A   | 84293  | redox-regulatory protein FAM213A isoform 2 precursor                           |    |    |       |      |    | 4  | 8     | 2.140 |       |      |       |       |      |                                  | oxidation-reduction process                                                  | antioxidant activity                                                         | Cytoplasm                                 |         |   |
| 12056465  | NP_001427.2    | FBL       | 2091   | rRNA 2'-O-methyltransferase fibrillarin                                        | 9  | 16 | 1.638 |      |    |    | 6     | 11    | 1.662 | 1.78 |       |       |      | Ribonucleoprotein                | Regulation of nucleobase, nucleoside, nucleotide and nucleic acid metabolism | Ribonucleoprotein                                                            | Nucleolus                                 | +       |   |
| 283135173 | NP_001164406.1 | FUS       | 2521   | RNA-binding protein FUS isoform 3                                              |    |    |       |      |    |    | 3     | 5     | 1.486 | 1.60 |       |       |      | RNA binding protein              | RNA localization                                                             | Nucleocytoplasmic transporter activity                                       | Nucleus                                   | +       |   |
| 378404908 | NP_001243728.1 | GAPDH     | 2597   | glyceraldehyde-3-phosphate dehydrogenase isoform 2                             | 2  | 4  | 2.460 |      |    | 2  | 4     | 1.875 |       |      |       |       |      | Enzyme: Dehydrogenase            | Metabolism,Energy pathways                                                   | Catalytic activity                                                           | Cytoplasm                                 |         |   |
| 9506713   | NP_061856.1    | GAR1      | 54433  | H1ACA ribonucleoprotein complex subunit 1                                      |    |    |       |      |    | 3  | 6     | 1.616 | 1.49  |      |       |       |      | Enzyme: Reductase                | Regulation of nucleobase, nucleoside and nucleic acid metabolism             | Ribonucleoprotein                                                            | Nucleolus                                 | +       |   |
| 4503979   | NP_002046.1    | GFAP      | 2670   | glial fibrillary acidic protein isoform 1                                      | 17 | 25 | 3.054 | 4.91 | 16 | 23 | 2.078 | 5.25  | 14    | 21   | 1.940 | 1.40  |      | Structural protein               | Cell growth and/or maintenance                                               | Structural molecule activity                                                 | Cytoplasm                                 |         |   |
| 4885281   | NP_005282.1    | GLUD1     | 2746   | glutamate dehydrogenase 1, mitochondrial precursor                             | 4  | 5  | 2.417 |      |    |    |       |       |       |      |       |       |      | Enzyme: Dehydrogenase            | Metabolism,Energy pathways                                                   | Catalytic activity                                                           | Mitochondrion                             |         |   |
| 40556376  | NP_115958.2    | GLYR1     | 84656  | putative oxidoreductase GLYR1                                                  |    |    |       |      |    | 2  | 3     | 1.507 |       |      |       |       |      | Enzyme: Dehydrogenase            | Metabolism,Energy pathways                                                   | Catalytic activity                                                           | Nucleus                                   |         |   |
| 10567816  | NP_066268.1    | GNAO1     | 2775   | guanine nucleotide-binding protein G(o) subunit alpha isoform a                | 3  | 3  | 1.563 | 0.46 |    |    |       |       | 4     | 5    | 0.626 | 0.16  |      | G protein                        | Cell communication,Signal transduction                                       | GTPase activity                                                              | Membrane                                  |         |   |
| 54114974  | NP_444292.1    | GNG2      | 54331  | guanine nucleotide-binding protein G12(G13)/G12(G13) subunit gamma-2 precursor |    |    |       |      |    |    |       |       | 2     | 3    | 0.425 | 0.40  |      | G protein                        | Cell communication,Signal transduction                                       | GTPase activity                                                              | Membrane                                  |         |   |
| 387598076 | NP_001248376.1 | GPM6A     | 2823   | neuronal membrane glycoprotein M6-a isoform 2                                  | 3  | 3  | 1.759 | 0.77 |    |    |       |       | 2     | 2    | 0.484 | 0.45  |      | Integral membrane protein        | Neurogenesis                                                                 | Ion channel activity                                                         | Membrane                                  |         |   |
| 4885371   | NP_005309.1    | H1FO      | 3005   | histone H1.0                                                                   | 4  | 30 | 1.713 |      |    | 5  | 35    | 2.249 |       |      |       |       |      | DNA binding protein              | Regulation of nucleobase, nucleoside, nucleotide and nucleic acid metabolism | DNA binding                                                                  | Nucleus                                   | +       |   |
| 5174449   | NP_006017.1    | H1FX      | 8971   | histone H1x                                                                    | 4  | 13 | 1.653 |      |    | 4  | 17    | 2.438 |       | 4    | 16    | 1.889 | 1.55 |                                  | DNA binding protein                                                          | Regulation of nucleobase, nucleoside, nucleotide and nucleic acid metabolism | DNA binding                               | Nucleus | + |
| 4504253   | NP_002096.1    | H2AFX     | 3014   | histone H2AX                                                                   | 2  | 2  | 0.431 |      |    |    |       |       |       |      |       |       |      | DNA binding protein              | DNA repair                                                                   | DNA binding                                                                  | Nucleus                                   | +       |   |
| 20336748  | NP_613075.1    | H2AFY     | 9555   | core histone macro-H2A.1 isoform 1                                             |    |    |       |      |    |    |       |       | 7     | 11   | 3.786 | 1.49  |      | DNA binding protein              | Regulation of nucleobase, nucleoside, nucleotide and nucleic acid metabolism | DNA binding                                                                  | Nucleus                                   | +       |   |
| 4504255   | NP_002097.1    | H2AFZ     | 3015   | histone H2AZ                                                                   | 2  | 6  | 1.998 |      |    | 2  | 5     | 1.561 |       | 2    | 6     | 2.701 | 1.64 |                                  | DNA binding protein                                                          | Regulation of nucleobase, nucleoside, nucleotide and nucleic acid metabolism | DNA binding                               | Nucleus | + |
| 117168248 | NP_057479.2    | HACD3     | 51495  | very-long-chain (3R)-hydroxyl-CoA dehydratase 3                                | 2  | 2  | 2.053 |      |    |    |       |       |       |      |       |       |      | -                                | -                                                                            | -                                                                            | Endoplasmic reticulum                     |         |   |
| 4504347   | NP_000549.1    | HBA1      | 3039   | hemoglobin subunit alpha                                                       | 3  | 14 | 2.181 | 1.65 |    |    |       |       |       |      |       |       |      | Transport/cargo protein          | Transport                                                                    | Transporter activity                                                         | Cytoplasm                                 |         |   |
| 4504349   | NP_000509.1    | HB        | 3043   | hemoglobin subunit beta                                                        | 11 | 39 | 2.147 | 1.53 |    |    |       |       |       |      |       |       |      | Transport/cargo protein          | Transport                                                                    | Transporter activity                                                         | Extracellular                             |         |   |
| 4885373   | NP_005316.1    | HIST1H1A  | 3024   | histone H1.1                                                                   |    |    |       |      |    | 3  | 4     | 3.136 |       |      |       |       |      | DNA binding protein              | Regulation of nucleobase, nucleoside, nucleotide and nucleic acid metabolism | DNA binding                                                                  | Nucleus                                   | +       |   |
| 4885381   | NP_005313.1    | HIST1H1B  | 3009   | histone H1.5                                                                   | 7  | 27 | 2.815 | 0.73 | 8  | 27 | 2.788 |       | 7     | 18   | 4.726 | 13.30 |      | DNA binding protein              | Regulation of nucleobase, nucleoside, nucleotide and nucleic acid metabolism | DNA binding                                                                  | Nucleus                                   | +       |   |
| 4885375   | NP_005310.1    | HIST1H1C  | 3006   | histone H1.2                                                                   | 3  | 9  | 3.478 | 1.44 | 3  | 10 | 4.044 | 2.06  | 3     | 10   | 3.483 | 2.65  |      | DNA binding protein              | Regulation of nucleobase, nucleoside, nucleotide and nucleic acid metabolism | DNA binding                                                                  | Nucleus                                   | +       |   |
| 4885377   | NP_005311.1    | HIST1H1D  | 3007   | histone H1.3                                                                   | 1  | 2  | 2.183 |      |    | 2  | 4     | 4.208 |       | 2    | 4     | 7.321 | 3.60 |                                  | DNA binding protein                                                          | Regulation of nucleobase, nucleoside, nucleotide and nucleic acid metabolism | DNA binding                               | Nucleus | + |
| 4885379   | NP_005312.1    | HIST1H1E  | 3008   | histone H1.4                                                                   |    |    |       |      |    | 2  | 7     | 2.002 | 1.81  | 2    | 8     | 1.811 | 1.89 |                                  | DNA binding protein                                                          | Regulation of nucleobase, nucleoside, nucleotide and nucleic acid metabolism | DNA binding                               | Nucleus | + |
| 10800144  | NP_066544.1    | HIST1H2AJ | 8331   | histone cluster 1, H2aj                                                        | 1  | 6  | 3.829 |      |    | 1  | 5     | 2.115 |       | 1    | 7     | 4.403 | 1.38 |                                  | DNA binding protein                                                          | Regulation of nucleobase, nucleoside, nucleotide and nucleic acid metabolism | DNA binding                               | Nucleus | + |
| 10800140  | NP_066406.1    | HIST1H2BB | 3018   | histone H2B type 1-B                                                           | 2  | 3  | 3.463 |      |    | 2  | 3     | 1.755 |       | 2    | 3     | 2.666 | 2.59 |                                  | DNA binding protein                                                          | Regulation of nucleobase, nucleoside, nucleotide and nucleic acid metabolism | DNA binding                               | Nucleus | + |
| 10800138  | NP_066407.1    | HIST1H2BD | 3017   | histone H2B type 1-D                                                           | 2  | 5  | 2.654 |      |    | 1  | 4     | 1.553 |       | 2    | 5     | 2.499 | 1.39 |                                  | DNA binding protein                                                          | Chromosome organization and biogenesis (sensu Eukarya)                       | DNA binding                               | Nucleus | + |
| 4504313   | NP_003535.1    | HIST1H4B  | 8366   | histone H4                                                                     | 6  | 19 | 3.717 |      |    | 6  | 25    | 2.142 | 1.33  | 6    | 27    | 3.327 | 3.79 |                                  | DNA binding protein                                                          | Regulation of nucleobase, nucleoside, nucleotide and nucleic acid metabolism | DNA binding                               | Nucleus | + |
| 751368126 | NP_001291434.1 | HMG20A    | 10363  | high mobility group protein 20A isoform a                                      | 2  | 2  | 0.404 |      |    | 2  | 2     | 0.546 |       |      |       |       |      | Transcription regulatory protein | Regulation of nucleobase, nucleoside and nucleic acid metabolism             | Transcription regulator activity                                             | Nucleus                                   | +       |   |
| 22208967  | NP_665906.1    | HMG1A     | 3159   | high mobility group protein 1/HMG-Y isoform a                                  |    |    |       |      |    | 3  | 13    | 2.201 |       |      |       |       |      | DNA binding protein              | Regulation of nucleobase, nucleoside, nucleotide and nucleic acid metabolism | DNA binding                                                                  | Nucleus                                   | +       |   |
| 4504425   | NP_002119.1    | HMG1B     | 3146   | high mobility group protein B1                                                 | 5  | 16 | 3.679 | 1.41 | 5  | 16 | 2.634 | 1.52  | 5     | 16   | 3.346 | 1.56  |      | DNA binding protein              | Regulation of nucleobase, nucleoside, nucleotide and nucleic acid metabolism | DNA binding                                                                  | Nucleus                                   | +       |   |
| 194688133 | NP_001124160.1 | HMG1C     | 3148   | high mobility group protein B2                                                 | 5  | 8  | 1.959 | 1.64 | 5  | 7  | 2.729 | 2.35  | 5     | 7    | 3.890 | 3.31  |      | Transcription regulatory protein | Regulation of nucleobase, nucleoside, nucleotide and nucleic acid metabolism | Transcription regulator activity                                             | Nucleus                                   | +       |   |
| 48255833  | NP_004956.5    | HMG1N     | 3150   | non-histone chromosomal protein HMG-14                                         |    |    |       |      |    |    |       |       | 4     | 9    | 1.940 | 1.48  |      | Transcription regulatory protein | Regulation of nucleobase, nucleoside, nucleotide and nucleic acid metabolism | Transcription regulator activity                                             | Nucleus                                   | +       |   |
| 10635240  | NP_006344.1    | HMG1D     | 10473  | high mobility group nucleosome-binding domain-containing protein 4             |    |    |       |      |    | 1  | 2     | 1.757 | 1.28  |      |       |       |      | Transcription regulatory protein | Regulation of nucleobase, nucleoside, nucleotide and nucleic acid metabolism | Transcription regulator activity                                             | Nucleus                                   | +       |   |
| 5803036   | NP_006796.1    | HNRNPA0   | 10949  | heterogeneous nuclear ribonucleoprotein A0                                     | 4  | 7  | 0.549 |      |    |    |       |       | 4     | 7    | 0.209 | 1.39  |      | Ribonucleoprotein                | Regulation of nucleobase, nucleoside, nucleotide and nucleic acid metabolism | RNA binding                                                                  | Nucleus                                   | +       |   |
| 4504445   | NP_002127.1    | HNRNPA1   | 3178   | heterogeneous nuclear ribonucleoprotein A1 isoform a                           | 7  | 16 | 0.287 |      |    |    |       |       | 7     | 16   | 0.165 | 1.52  |      | RNA binding protein              | Regulation of nucleobase, nucleoside, nucleotide and nucleic acid metabolism | RNA binding                                                                  | Nucleus                                   | +       |   |
| 14043072  | NP_112533.1    | HNRNPA2B1 | 3181   | heterogeneous nuclear ribonucleoproteins A2/B1 isoform B1                      | 14 | 36 | 0.226 |      |    | 11 | 28    | 0.649 | 1.37  | 12   | 29    | 0.173 | 1.39 |                                  | RNA binding protein, Ribonucleoprotein                                       | Regulation of nucleobase, nucleoside, nucleotide and nucleic acid metabolism | RNA binding, Transcription factor binding | Nucleus | + |
| 34740329  | NP_919223.1    | HNRNPA3   | 220988 | heterogeneous nuclear ribonucleoprotein A3                                     | 10 | 29 | 0.278 |      |    | 10 | 31    | 0.613 |       | 10   | 26    | 0.148 |      |                                  | Ribonucleoprotein                                                            | Regulation of nucleobase, nucleoside, nucleotide and nucleic acid metabolism | RNA binding                               | Nucleus | + |
| 5595921   | NP_004490.2    | HNRNPAB   | 3182   | heterogeneous nuclear ribonucleoprotein A/B isoform b                          | 4  | 11 | 0.353 |      |    |    |       |       | 3     | 9    | 0.146 | 2.03  |      | Ribonucleoprotein                | Regulation of nucleobase, nucleoside, nucleotide and nucleic acid metabolism | MRNA binding                                                                 | Nucleolus                                 | +       |   |
| 117190174 | NP_004491.2    | HNRNPC    | 3183   | heterogeneous nuclear ribonucleoproteins C1/C2 isoform b                       | 12 | 35 | 0.452 | 1.30 |    |    |       |       | 13    | 40   | 0.383 | 2.98  |      | RNA binding protein              | Regulation of nucleobase, nucleoside, nucleotide and nucleic acid metabolism | RNA binding                                                                  | Nucleus                                   | +       |   |









|           |                |        |        |                                                                      |   |    |       |      |   |   |       |       |      |   |       |       |                                  |                                                                              |                                        |                                                                              |                                        |                                                                              |                                  |         |   |
|-----------|----------------|--------|--------|----------------------------------------------------------------------|---|----|-------|------|---|---|-------|-------|------|---|-------|-------|----------------------------------|------------------------------------------------------------------------------|----------------------------------------|------------------------------------------------------------------------------|----------------------------------------|------------------------------------------------------------------------------|----------------------------------|---------|---|
| 5032179   | NP_005753.1    | TRIM28 | 10155  | transcription intermediary factor 1-beta                             |   |    |       |      |   | 3 | 3     | 0.523 | 1.28 |   |       |       | Transcription regulatory protein | Regulation of nucleobase, nucleoside, nucleotide and nucleic acid metabolism | Transcription regulator activity       | Nucleus                                                                      | *                                      |                                                                              |                                  |         |   |
| 733606247 | NP_001290046.1 | TUBA1C | 84790  | tubulin alpha-1C chain isoform b                                     |   |    |       |      |   |   |       |       | 4    | 7 | 0.556 | 6.50  | Cytoskeletal protein             | Cell growth and/or maintenance                                               | Structural constituent of cytoskeleton | Cytoplasm                                                                    |                                        |                                                                              |                                  |         |   |
| 28788768  | NP_821080.1    | TUBB2B | 347733 | tubulin beta-2B chain                                                |   |    |       |      |   | 2 | 5     | 0.537 | 1.47 | 2 | 4     | 0.404 | 1.74                             | Cytoskeletal protein                                                         | Cell growth and/or maintenance         | Structural constituent of cytoskeleton                                       | Cytoplasm                              |                                                                              |                                  |         |   |
| 60279268  | NP_001012496.1 | UZAF2  | 11338  | splicing factor UZAF 65 kDa subunit isoform b                        |   |    |       |      |   |   |       |       |      | 3 | 6     | 1.662 | 1.41                             | RNA binding protein                                                          | RNA metabolism                         | Spliceosomal catalysis                                                       | Nucleus                                | *                                                                            |                                  |         |   |
| 122937227 | NP_001073884.1 | UZSURP | 23350  | U2 snRNP-associated SURP motif-containing protein                    | 2 | 2  | 1.489 | 1.88 |   |   |       |       |      |   |       |       |                                  | RNA binding protein                                                          | RNA processing                         | RNA-binding                                                                  | Nucleus                                | *                                                                            |                                  |         |   |
| 601984520 | NP_066289.3    | UBC    | 7316   | polyubiquitin-C                                                      | 1 | 2  | 2.545 |      |   |   |       |       |      |   |       |       |                                  | Ubiquitin proteasome system protein                                          | protein metabolism                     | Ubiquitin-specific protease activity                                         | Cytoplasm                              |                                                                              |                                  |         |   |
| 4759302   | NP_004729.1    | VAPB   | 9217   | vesicle-associated membrane protein-associated protein B/C isoform 1 | 2 | 3  | 0.657 | 1.57 | 2 | 3 | 0.442 | 1.56  | 1    | 2 | 0.505 | 0.68  |                                  | Membrane transport protein                                                   | transport                              | Auxiliary transport protein activity                                         | Membrane                               |                                                                              |                                  |         |   |
| 6005942   | NP_009057.1    | VCP    | 7415   | transitional endoplasmic reticulum ATPase                            | 2 | 2  | 0.657 |      |   |   |       |       |      |   |       |       |                                  | ATPase                                                                       | Metabolism,Energy pathways             | ATPase activity                                                              | Nucleolus                              |                                                                              |                                  |         |   |
| 4507879   | NP_003365.1    | VDAC1  | 7416   | voltage-dependent anion-selective channel protein 1                  | 1 | 2  | 1.851 |      | 2 | 3 | 0.626 |       |      |   |       |       |                                  | Voltage-gated channel                                                        | Transport                              | Voltage-gated ion channel activity                                           | Mitochondrion                          |                                                                              |                                  |         |   |
| 62414289  | NP_003371.2    | VIM    | 7431   | vimentin                                                             | 9 | 14 | 2.007 | 2.40 |   |   |       |       |      | 9 | 14    | 3.373 | 5.10                             |                                                                              | Cytoskeletal protein                   | Cell growth and/or maintenance                                               | Structural constituent of cytoskeleton | Cytoplasm                                                                    |                                  |         |   |
| 63025214  | NP_001017980.1 | VMA21  | 203547 | vacuolar ATPase assembly integral membrane protein VMA21             |   |    |       |      | 1 | 2 | 0.558 |       |      | 1 | 2     | 0.549 | 1.33                             |                                                                              | Unclassified                           | vacuolar proton-transporting V-type ATPase complex assembly                  | Molecular function unknown             | Cytoplasm                                                                    |                                  |         |   |
| 7706501   | NP_057396.1    | WBP11  | 51729  | WW domain-binding protein 11                                         |   |    |       |      | 1 | 2 | 1.952 |       |      |   |       |       |                                  |                                                                              | RNA binding protein                    | Regulation of nucleobase, nucleoside, nucleotide and nucleic acid metabolism | RNA binding                            | Nucleus                                                                      | *                                |         |   |
| 10863945  | NP_066964.1    | XRCC5  | 7520   | X-ray repair cross-complementing protein 5                           | 4 | 7  | 0.661 | 1.72 |   |   |       |       |      |   |       |       |                                  |                                                                              | DNA binding protein                    | Regulation of nucleobase, nucleoside, nucleotide and nucleic acid metabolism | DNA repair protein                     | Nucleus                                                                      | *                                |         |   |
| 34101286  | NP_057191.2    | ZFR    | 51663  | zinc finger RNA-binding protein                                      | 3 | 3  | 0.401 |      |   |   |       |       | 4    | 4 | 0.671 | 1.43  | 4                                | 4                                                                            | 0.552                                  | 0.74                                                                         | Transcription regulatory protein       | Regulation of nucleobase, nucleoside, nucleotide and nucleic acid metabolism | Transcription regulator activity | Nucleus | * |
| 33946297  | NP_892021.1    | ZNF326 | 284695 | DBIRD complex subunit ZNF326 isoform 1                               | 2 | 3  | 0.512 |      |   |   |       |       |      | 2 | 3     | 0.438 |                                  |                                                                              | DNA binding protein                    | Regulation of nucleobase, nucleoside, nucleotide and nucleic acid metabolism | DNA binding                            | Nucleolus                                                                    | *                                |         |   |
| 404501455 | NP_001258218.1 | ZNF512 | 84450  | zinc finger protein 512 isoform d                                    | 5 | 6  | 1.634 |      |   |   |       |       | 5    | 7 | 1.570 |       |                                  |                                                                              | Transcription regulatory protein       | Regulation of nucleobase, nucleoside, nucleotide and nucleic acid metabolism | Transcription regulator activity       | Nucleus                                                                      | *                                |         |   |

Supplementary Table S2: Differentially expressed proteins in Grade 4 astrocytoma. A list of 102 unique proteins (at 5% FDR) were identified after applying quality control (see also Methods in Methods section). The table displays the total number of proteins identified in individual experiments along with their quality scores.

| Protein Accession | RefSeq ID   | Gene Symbol | Gene ID | Protein Name             | Coverage | DP Proteins | DP Unique Peptides | DP FDRs | 151514 | 151514 Count | 151514 Variability | Maximum Score | # AA | MW (kDa) | Exp. ID | 151514 | 116 | 115 | Peptides Matched | KCov | Probability | # of Sequences | Ion Ratio | Charge | m/z [D] | MW [D]  | AM [D] | RT [min] | Final Score | Lab. Score | MS Order | Exp. Number | Section File                    |
|-------------------|-------------|-------------|---------|--------------------------|----------|-------------|--------------------|---------|--------|--------------|--------------------|---------------|------|----------|---------|--------|-----|-----|------------------|------|-------------|----------------|-----------|--------|---------|---------|--------|----------|-------------|------------|----------|-------------|---------------------------------|
| G00207            | NP_001045.1 | SLB         | 313     | serpin family B member 1 | 23.32    | 1           | 10                 | 1       | 1      | 10           | 1.00               | 7.31          | 28   | 45.4     | 34.0    | 63     | 2   |     | 1000             | 0.00 | 0.00        | 1              | 0.00      | 2.56   | 528.230 | 150.022 | 0.50   | 45.50    | 4550        | 4550       | 1452     | 14          | 010018_0001_0001_0001_0001      |
| G00207            | NP_001045.1 | SLB         | 313     | serpin family B member 1 | 23.32    | 1           | 10                 | 1       | 1      | 10           | 1.00               | 7.31          | 28   | 45.4     | 34.0    | 63     | 2   |     | 1000             | 0.00 | 0.00        | 1              | 0.00      | 2.56   | 528.230 | 150.022 | 0.50   | 45.50    | 4550        | 4550       | 1452     | 14          | 010018_0001_0001_0001_0001_0001 |
| G00207            | NP_001045.1 | SLB         | 313     | serpin family B member 1 | 23.32    | 1           | 10                 | 1       | 1      | 10           | 1.00               | 7.31          | 28   | 45.4     | 34.0    | 63     | 2   |     | 1000             | 0.00 | 0.00        | 1              | 0.00      | 2.56   | 528.230 | 150.022 | 0.50   | 45.50    | 4550        | 4550       | 1452     | 14          | 010018_0001_0001_0001_0001_0001 |
| G00207            | NP_001045.1 | SLB         | 313     | serpin family B member 1 | 23.32    | 1           | 10                 | 1       | 1      | 10           | 1.00               | 7.31          | 28   | 45.4     | 34.0    | 63     | 2   |     | 1000             | 0.00 | 0.00        | 1              | 0.00      | 2.56   | 528.230 | 150.022 | 0.50   | 45.50    | 4550        | 4550       | 1452     | 14          | 010018_0001_0001_0001_0001_0001 |
| G00207            | NP_001045.1 | SLB         | 313     | serpin family B member 1 | 23.32    | 1           | 10                 | 1       | 1      | 10           | 1.00               | 7.31          | 28   | 45.4     | 34.0    | 63     | 2   |     | 1000             | 0.00 | 0.00        | 1              | 0.00      | 2.56   | 528.230 | 150.022 | 0.50   | 45.50    | 4550        | 4550       | 1452     | 14          | 010018_0001_0001_0001_0001_0001 |























| Product Code | Product Name      | Brand | Category | Material          | Dimensions      | Weight | Price  | Availability | Supplier | Supplier Address                   | Supplier Phone | Supplier Email    | Supplier Website |
|--------------|-------------------|-------|----------|-------------------|-----------------|--------|--------|--------------|----------|------------------------------------|----------------|-------------------|------------------|
| 8077950      | HP OFFICEJET PLUS | HP    | Printer  | HP OfficeJet Plus | 425 x 344 x 132 | 2.1    | 187.00 | In Stock     | HP Inc.  | 151 Street, Fort Collins, CO 80504 | 970.221.4000   | hp.support@hp.com | hp.com           |
| 8077950      | HP OFFICEJET PLUS | HP    | Printer  | HP OfficeJet Plus | 425 x 344 x 132 | 2.1    | 187.00 | In Stock     | HP Inc.  | 151 Street, Fort Collins, CO 80504 | 970.221.4000   | hp.support@hp.com | hp.com           |
| 8077950      | HP OFFICEJET PLUS | HP    | Printer  | HP OfficeJet Plus | 425 x 344 x 132 | 2.1    | 187.00 | In Stock     | HP Inc.  | 151 Street, Fort Collins, CO 80504 | 970.221.4000   | hp.support@hp.com | hp.com           |
| 8077950      | HP OFFICEJET PLUS | HP    | Printer  | HP OfficeJet Plus | 425 x 344 x 132 | 2.1    | 187.00 | In Stock     | HP Inc.  | 151 Street, Fort Collins, CO 80504 | 970.221.4000   | hp.support@hp.com | hp.com           |
| 8077950      | HP OFFICEJET PLUS | HP    | Printer  | HP OfficeJet Plus | 425 x 344 x 132 | 2.1    | 187.00 | In Stock     | HP Inc.  | 151 Street, Fort Collins, CO 80504 | 970.221.4000   | hp.support@hp.com | hp.com           |









| ID    | Code       | Category | Name | Species                                 | Status         | Value | Unit | ...    | Value | Unit | ... | Value | Unit | ... | Value | Unit | ... | Value | Unit | ... | Value | Unit | ... | Value | Unit | ... | Value | Unit | ... | Value | Unit | ... | Value | Unit | ... | Value | Unit | ... |     |     |     |     |     |
|-------|------------|----------|------|-----------------------------------------|----------------|-------|------|--------|-------|------|-----|-------|------|-----|-------|------|-----|-------|------|-----|-------|------|-----|-------|------|-----|-------|------|-----|-------|------|-----|-------|------|-----|-------|------|-----|-----|-----|-----|-----|-----|
| 46981 | NP_00074.1 | NP22     | HL68 | RNA essential protein 12 (Homo sapiens) | NCBI:NM_001019 | 10.18 | 1    | 0.9113 | 14.2  | 4.38 | 124 | 14.8  | 9.10 | ... | ...   | ...  | ... | ...   | ...  | ... | ...   | ...  | ... | ...   | ...  | ... | ...   | ...  | ... | ...   | ...  | ... | ...   | ...  | ... | ...   | ...  | ... | ... | ... | ... |     |     |
| 46982 | NP_00074.1 | NP22     | HL68 | RNA essential protein 12 (Homo sapiens) | NCBI:NM_001019 | 10.18 | 1    | 0.9113 | 14.2  | 4.38 | 124 | 14.8  | 9.10 | ... | ...   | ...  | ... | ...   | ...  | ... | ...   | ...  | ... | ...   | ...  | ... | ...   | ...  | ... | ...   | ...  | ... | ...   | ...  | ... | ...   | ...  | ... | ... | ... | ... | ... | ... |

















































**Supplementary Table S6: Ingenuity Pathway Analysis of the non-redundant list of differentially expressed nuclear proteins (n=244) identified in different grades of astrocytomas.**

The proteins associated with major canonical pathways (A), molecular and cellular functions (B) and networks and processes (C), are listed with their p-value. The Table shows only top 5 canonical pathways, molecular and cellular functions, and networks. In (C), proteins present in the dataset mapping to respective networks are shown in bold.

**A. Canonical pathways**

| Pathway                                                      | Molecules                                                                   | -log (P-value) | Ratio    |
|--------------------------------------------------------------|-----------------------------------------------------------------------------|----------------|----------|
| Granzyme A Signaling                                         | <b>HIST1H1A, HIST1H1B, HIST1H1C, HIST1H1E, H1FX, HIST1H1D, HMGB2, H1F0</b>  | 1.48E-11       | 4.71E-01 |
| Granzyme B Signaling                                         | <b>PRKDC, NUMA1, LMNB2, LMNB1, PARP1</b>                                    | 1.32E-06       | 3.12E-01 |
| EIF2 Signaling                                               | <b>RPS19, RPL22, RPLP2, RPS25, RPS3, PPP1CA, RPL7A, RPL18, RPL31, RPS14</b> | 8.07E-05       | 5.81E-02 |
| DNA Double-Strand Break Repair by Non-Homologous End Joining | <b>PRKDC, XRCC5, PARP1</b>                                                  | 6.92E-04       | 2.14E-01 |
| Telomere Extension by Telomerase                             | <b>HNRNPA1, HNRNPA2B1, XRCC5</b>                                            | 8.56E-04       | 2E-01    |

**B. Molecular and cellular functions**

| Category                              | p-value           | Molecules                                                                                                                                                                                                                                                                                                                                                      |
|---------------------------------------|-------------------|----------------------------------------------------------------------------------------------------------------------------------------------------------------------------------------------------------------------------------------------------------------------------------------------------------------------------------------------------------------|
| RNA Post-Transcriptional Modification | 6.57E-35-1.26E-03 | <b>HNRNPL, DDX21, SRSF9, PRPF8, HNRNPA2B1, SFPQ, ELAVL4, DDX17, HNRNPK, ELAVL1, TRA2A, SRSF1, DDX5, THRAP3, U2AF2, RBMX, NOLC1, HNRNPC, CDC5L, FBL, HNRNPA0, RPS19, SNRPA, SON, HNRNPU, KHDRBS1, RBM5, PPIG, DKC1, SYNCRIP, HNRNPD, SNW1, ADAR, HBB, HNRNPM, PTBP1, ALB, ZNF326, FUS, SNRPC, HNRNPA1, CIRBP, SRSF7, PABPN1, RBM8A, SNRNP70, SRSF5, HNRNPH3</b> |
| Cell Death and Survival               | 4.42E-12-1.29E-02 | <b>CRYAB, THOC2, MBP, TRAP1, CTSG, SFPQ, RSL1D1, HBA1/HBA2, HSPA5, CBX5, LMNB1, ELAVL1, HMGB1, SRSF1, TOP1, LTF, SMPD4, SUB1, VAPB, PPP1CA, PGRMC1, MGST1, PELP1, SON, ATP5A1, LMNA, SNW1, ANXA2, HMGA1, SSRP1, MPO, CD9, SMARCA2, HNRNPA1, H2AFX, TMX1, HNRNPUL2, RTN4, GAPDH, GPM6A, VDAC1, PML,</b>                                                         |

|                                   |                   |                                                                                                                                                                                                                                                                                                                                                                                                                                                                                                                                                                                                                                          |
|-----------------------------------|-------------------|------------------------------------------------------------------------------------------------------------------------------------------------------------------------------------------------------------------------------------------------------------------------------------------------------------------------------------------------------------------------------------------------------------------------------------------------------------------------------------------------------------------------------------------------------------------------------------------------------------------------------------------|
|                                   |                   | <b>MTDH, XRCC5, RBBP4, HIST1H1C, APOE, DEK, NFIX, PRDX5, PRPF8, SNRPE, PPIA, ILF2, TMEM214, DDX17, CD74, HNRNPK, TOP2B, ANXA1, ANXA5, VCP, HNRNPC, NCL, PCBP2, RPS3, BCAP31, DHX9, PRKDC, RPS19, HNRNPU, KHDRBS1, RBM5, TRIM28, GLUD1, HSPD1, MSI2, PSIP1, HBB, PARP1, PLG, ENO1, ALB, APOA1, NFIB, TP53BP1, CYB5A</b>                                                                                                                                                                                                                                                                                                                   |
| Cellular Growth and Proliferation | 9.35E-12-1.29E-02 | <b>HP1BP3, ILF3, PLP1, MBP, CTSG, TRAP1, SFPQ, RSL1D1, HSPA5, LMNB1, ELAVL1, HMGB1, SRSF1, TOP1, DDX5, THRAP3, LTF, PPP1CA, HNRNPA0, SON, PELP1, NUMA1, ATP5A1, DKC1, LMNA, ANXA2, SNW1, HMGA1, ADAR, PTBP1, HNRNPAB, ATP5B, CD9, FUS, SMARCA2, HNRNPA1, RTN4, HIST1H1D, GAPDH, RPS25, VDAC1, PML, ACTG1, XRCC5, RBBP4, PBRM1, DDX21, APOE, PRPF8, TPR, HNRNPA2B1, ILF2, PPIA, HMGB2, CD74, DDX17, H2AFZ, HNRNPK, TOP2B, TRA2A, HNRNPR, ANXA1, HNRNPC, BCAP31, NCL, PURA, RPS19, HNRNPU, KHDRBS1, RBM5, TRIM28, HNRNPD, HSPD1, HNRNPM, PARP1, HIST1H1B, PLG, ENO1, ANXA6, APOA1, H2AFY, CIRBP, NOP2, PSAP, TP53BP1, NFIB, UBC, RPS14</b> |
| Gene Expression                   | 5.23E-10-1.29E-02 | <b>HP1BP3, ILF3, SFPQ, CBX5, ELAVL1, HMGB1, DDX5, TOP1, LTF, THRAP3, SUB1, NOLC1, ALYREF, PELP1, GNG2, SMARCA5, SYNCRIP, LMNA, SNW1, HMGA1, ADAR, SSRP1, MPO, TFAM, BASP1, CD9, SMARCA2, HNRNPA1, BUD31, PABPN1, GAPDH, PML, MTDH, XRCC5, DEK, DDX21, APOE, NFIX, PPIB, PRPF8, TPR, HNRNPA2B1, ILF2, HMGB2, DDX17, RPL7A, H2AFZ, HNRNPK, RBMX, RPS3, PURA, HNRNPC, DHX9, PRKDC, RBM5, MECP2, TRIM28, PSIP1, HBB, PARP1, PLG, HIST1H1B, ENO1, ALB, SNRPC, CIRBP, H2AFY, TP53BP1, NFIB, RPS14</b>                                                                                                                                          |
| Cellular Development              | 1.08E-08-1.29E-02 | <b>ILF3, MBP, CTSG, SFPQ, RSL1D1, HSPA5, LMNB1, ELAVL1, HMGB1, TOP1, DDX5, LTF, HIST1H4B, ALYREF, FBL, SON, PELP1, NUMA1, SMARCA5, SYNCRIP, ANXA2, SNW1, HMGA1, PTBP1, ATP5B, FUS, CD9, SMARCA2, HNRNPA1, HIST1H1D, GAPDH, FAM213A, GPM6A, RPS25, PML, XRCC5, DEK, DDX21, APOE, PRPF8, HNRNPA2B1, HMGB2, DDX17, CD74, H2AFZ, HNRNPK, TRA2A, RBMX, ANXA1, HSPE1, HNRNPC, NCL, PURA, DHX9, RPS19, HNRNPU, RBM5, TRIM28, HSPD1, PARP1, PLG, ENO1, ALB, ANXA6, APOA1, H2AFY, CIRBP, NFIB, RPS14</b>                                                                                                                                          |

### C. Networks and processes

| Top Functions                                       | Molecules in Network                                                                                                                                                                                                                | Score | Focus Molecules |
|-----------------------------------------------------|-------------------------------------------------------------------------------------------------------------------------------------------------------------------------------------------------------------------------------------|-------|-----------------|
| Gene Expression, Cell Death and Survival, Embryonic | <b>ANXA1, CD74, CDC5L, ELAVL1, GSK3, H2AFX, HIST1H1C, HMGA1, HNRNPD, IFN Beta, ILF2, ILF3, LTF, MECP2, MEK, MPO, MSI2, MTDH, NCL, NFIX, NFkB (complex), PI3K (family), PRKDC, Rnr, RPA, RPS14, SNW1, SSRP1, TFAM, THRAP3, TOP1,</b> | 43    | 28              |

|                                                                                      |                                                                                                                                                                                                                                                                                           |    |    |
|--------------------------------------------------------------------------------------|-------------------------------------------------------------------------------------------------------------------------------------------------------------------------------------------------------------------------------------------------------------------------------------------|----|----|
| Development                                                                          | <b>TOP2B, TP53BP1, U2AF2, XRCC5</b>                                                                                                                                                                                                                                                       |    |    |
| RNA Post-Transcriptional Modification, Infectious Diseases, Cellular Development     | <b>ANXA2, ANXA5, ANXA6, Cyclin A, Cyclin E, DDX21, DHX9, ERK1/2, FBL, HBB, HNRNPAB, HNRNPC, HNRNPL, HNRNPR, HNRNPU, HSPA5, JINK1/2, KHDRBS1, KHDRBS2, KHDRBS3, MAP2K1/2,p85 (pik3r), PELP1, PLG, PPIA, PPIB, Ras, RSL1D1, SFPQ, SNRNP70, SRSF1, SRSF5, SYNCRIP, TUBA1C, VDAC1</b>         | 43 | 28 |
| RNA Post-Transcriptional Modification, Cell Death and Survival, Neurological Disease | <b>Actin, ALYREF, BAZ1B, DDX5, DDX17, ENO1, FUS, GAPDH, Histone h3, Histone h4, HMGB1, HMGB2, HNRNPA1, HNRNPDL, HNRNPH3, HNRNPK, Hsp90, HSPD1, MATR3, MYEF2, MYL12A, NUMA1, P38 MAPK, PCBP1, RBBP4, RBMX, RNA polymerase II, RPS3, SMARCA5, SNRPD3, SRSF9, THOC2, TRAP1, VEGF, ZNF326</b> | 43 | 28 |
| RNA Post-Transcriptional Modification, Molecular Transport, RNA Trafficking          | <b>APP, ATXN2, CASC3, CSNK2A1, DDX6, Dynamin, Eif4g, G3BP1, GRB2, HNRNPA2B1, MAGOH, MBP, NME1, NOP58, NTRK3, PABPC1, PABPC4, PABPN1, PAPOLG, PPIA, PPIG, RBM8A, RPL18, RPL36, RPL7A, RPS19, RTN4, SNRPA, STRAP, STXBP1, SUB1, SYNCRIP, SYT1, TPI1, UPF3B</b>                              | 17 | 15 |
| Dermatological Diseases and Conditions, Developmental Disorder, Hereditary Disorder  | <b>ADD2, AGTR1, ARID2, CARD16, CARD17, CASP1, CHD4, CNTN1, DKC1, FBP1, GARI, GPM6A, GSTT2/GSTT2B, Histone h3, HMBOX1, HMGNI,HSPA6, MAFF, NCEH1, NFIB, NHP2, NOP10, PBRM1, PSG5, PTBP2, RGS10, RPL22, SBDS, SMARCA4, SRRM2, TERC, UBC, UBE2H, USP24, WDR1</b>                              | 17 | 15 |

**Supplementary Table S7: Top 5 significant Networks and processes identified in nuclear protein analysis of different grades of astrocytoma when analyzed separately using Ingenuity Pathway Analysis.**

| <b>Astrocytoma Grade</b>              | <b>Networks and processes</b>                                                                                                                                                                                                                                                                                                              |
|---------------------------------------|--------------------------------------------------------------------------------------------------------------------------------------------------------------------------------------------------------------------------------------------------------------------------------------------------------------------------------------------|
| <b>Diffuse astrocytoma (Grade II)</b> | <ol style="list-style-type: none"> <li>1. RNA Post-Transcriptional Modification, DNA Replication, Recombination, and Repair, Gene Expression</li> <li>2. Cell Death and Survival, Cellular Growth and Proliferation, DNA Replication, Recombination, and Repair</li> <li>3. Gene Expression, Cell Death and Survival, Embryonic</li> </ol> |

|                                                  |                                                                                                                                                                                                                                                                                                                                                                                                                                                                                                                                                                |
|--------------------------------------------------|----------------------------------------------------------------------------------------------------------------------------------------------------------------------------------------------------------------------------------------------------------------------------------------------------------------------------------------------------------------------------------------------------------------------------------------------------------------------------------------------------------------------------------------------------------------|
|                                                  | <p>Development</p> <ol style="list-style-type: none"> <li>4. RNA Post-Transcriptional Modification, Cellular Movement, Hematological Disease</li> <li>5. Lipid Metabolism, Molecular Transport, Small Molecule Biochemistry</li> </ol>                                                                                                                                                                                                                                                                                                                         |
| <p><b>Anaplastic astrocytoma (Grade III)</b></p> | <ol style="list-style-type: none"> <li>1. Cell Death and Survival, Cell Morphology, Cellular Assembly and Organization</li> <li>2. Dermatological Diseases and Conditions, Developmental Disorder, Hereditary Disorder</li> <li>3. DNA Replication, Recombination, and Repair, Cell Death and Survival, Nervous System Development and Function</li> <li>4. Cell Cycle, Cellular Development, Connective Tissue Development and Function</li> <li>5. Embryonic Development, Organ Development, Organ Morphology</li> </ol>                                     |
| <p><b>Glioblastoma multiforme (Grade IV)</b></p> | <ol style="list-style-type: none"> <li>1. RNA Post-Transcriptional Modification, Cell Death and Survival, Cell-To-Cell Signaling and Interaction</li> <li>2. RNA Post-Transcriptional Modification, Cell Cycle, DNA Replication, Recombination, and Repair</li> <li>3. Organismal Survival, Nervous System Development and Function, Cellular Development</li> <li>4. RNA Post-Transcriptional Modification, DNA Replication, Recombination, and Repair, Gene Expression</li> <li>5. Cell Cycle, Cell Morphology, Cellular Function and Maintenance</li> </ol> |

**Supplementary Table S8: Proteins identified to be differentially expressed in all the grades studied - Grade II, III and IV.** A total of 53 proteins identified were found common to all the grades. This protein subset has been derived from **Supplementary Table S2**.

| Accession | NP accession   | Gene Symbol | Gene id | Protein name                                                                          | Grade II protein fold change [115/114] | Grade III protein fold change [116/114] | Grade IV protein fold change [117/114] | Molecular class                       |
|-----------|----------------|-------------|---------|---------------------------------------------------------------------------------------|----------------------------------------|-----------------------------------------|----------------------------------------|---------------------------------------|
| 14043072  | NP_112533.1    | HNRNPA2B1   | 3181    | heterogeneous nuclear ribonucleoproteins A2/B1 isoform B1                             | 0.226                                  | 0.649                                   | 0.173                                  | RNA binding protein,Ribonucleoprotein |
| 109240550 | NP_001035879.1 | PSPC1       | 55269   | paraspeckle component 1                                                               | 0.261                                  | 0.315                                   | 0.423                                  | RNA binding protein                   |
| 34740329  | NP_919223.1    | HNRNPA3     | 220988  | heterogeneous nuclear ribonucleoprotein A3                                            | 0.278                                  | 0.613                                   | 0.148                                  | Ribonucleoprotein                     |
| 5730027   | NP_006550.1    | KHDRBS1     | 10657   | KH domain-containing, RNA-binding, signal transduction-associated protein 1 isoform 1 | 0.282                                  | 0.468                                   | 0.277                                  | RNA binding protein                   |
| 189217895 | NP_689901.2    | KHDRBS2     | 202559  | KH domain-containing, RNA-binding, signal transduction-associated protein 2           | 0.282                                  | 0.294                                   | 0.185                                  | RNA binding protein                   |
| 5730073   | NP_006549.1    | KHDRBS3     | 10656   | KH domain-containing, RNA-binding, signal transduction-associated protein 3           | 0.316                                  | 0.657                                   | 0.200                                  | RNA binding protein                   |
| 13676857  | NP_068814.2    | HSPA2       | 3306    | heat shock-related 70 kDa protein 2                                                   | 0.322                                  | 0.341                                   | 0.449                                  | Heat shock protein                    |
| 5032007   | NP_005850.1    | PURA        | 5813    | transcriptional activator protein Pur-alpha                                           | 0.331                                  | 0.594                                   | 0.147                                  | Transcription factor                  |
| 667743700 | NP_001288139.1 | MYEF2       | 50804   | myelin expression factor 2 isoform b                                                  | 0.345                                  | 0.589                                   | 0.303                                  | Transcription regulatory protein      |
| 160707950 | NP_001104262.1 | MECP2       | 4204    | methyl-CpG-binding protein 2 isoform 2                                                | 0.359                                  | 0.608                                   | 0.456                                  | DNA binding protein                   |
| 68509932  | NP_001020263.1 | MBP         | 4155    | myelin basic protein isoform 4                                                        | 0.373                                  | 0.404                                   | 0.400                                  | Structural protein                    |
| 664806003 | NP_001287744.1 | CIRBP       | 1153    | cold-inducible RNA-binding protein isoform 2                                          | 0.381                                  | 0.434                                   | 0.157                                  | RNA binding protein                   |
| 56118234  | NP_859067.2    | CENPV       | 201161  | centromere protein V                                                                  | 0.397                                  | 0.597                                   | 0.582                                  | DNA binding protein                   |
| 62750354  | NP_954659.1    | MATR3       | 9782    | matrin-3 isoform a                                                                    | 0.400                                  | 0.644                                   | 0.375                                  | RNA binding protein                   |
| 34101286  | NP_057191.2    | ZFR         | 51663   | zinc finger RNA-binding protein                                                       | 0.401                                  | 0.671                                   | 0.592                                  | Transcription regulatory protein      |
| 38201710  | NP_006377.2    | DDX17       | 10521   | probable ATP-dependent RNA helicase DDX17 isoform 1                                   | 0.417                                  | 0.567                                   | 0.535                                  | ATPase,RNA helicase                   |
| 221316767 | NP_001138246.1 | ELAVL4      | 1996    | ELAV-like protein 4 isoform 2                                                         | 0.427                                  | 0.450                                   | 0.418                                  | RNA binding protein                   |
| 70167113  | NP_001020278.1 | ADAR        | 103     | double-stranded RNA-specific adenosine deaminase isoform d                            | 0.448                                  | 0.560                                   | 0.509                                  | Enzyme: Deaminase                     |
| 4758138   | NP_004387.1    | DDX5        | 1655    | probable ATP-dependent RNA helicase DDX5                                              | 0.450                                  | 0.597                                   | 0.552                                  | RNA binding protein                   |
| 25952118  | NP_741960.1    | CAMK2A      | 815     | calcium/calmodulin-dependent protein kinase type II subunit alpha isoform 2           | 0.459                                  | 0.357                                   | 0.294                                  | Serine/threonine kinase               |
| 8923900   | NP_061156.1    | CMAS        | 55907   | N-acylneuraminate cytidyltransferase                                                  | 0.481                                  | 0.647                                   | 0.535                                  | Enzyme: Ligase                        |
| 109689718 | NP_001035937.1 | ABHD12      | 26090   | monoacylglycerol lipase ABHD12 isoform a                                              | 0.486                                  | 0.622                                   | 0.654                                  | Integral membrane protein             |
| 4758876   | NP_004634.1    | PABPN1      | 8106    | polyadenylate-binding protein 2                                                       | 0.488                                  | 0.617                                   | 0.567                                  | RNA binding protein                   |
| 68051721  | NP_065843.3    | NCEH1       | 57552   | neutral cholesterol ester hydrolase 1 isoform b                                       | 0.500                                  | 0.528                                   | 0.590                                  | Unclassified                          |
| 66346730  | NP_001015001.1 | CKMT1A      | 548596  | creatine kinase U-type, mitochondrial precursor                                       | 0.503                                  | 0.444                                   | 0.458                                  | Enzyme: Phosphotransferase            |
| 157412270 | NP_112480.2    | HNRNPM      | 4670    | heterogeneous nuclear ribonucleoprotein M isoform b                                   | 0.504                                  | 0.548                                   | 0.674                                  | Ribonucleoprotein                     |
| 19923653  | NP_150091.2    | PSIP1       | 11168   | PC4 and SFRS1-interacting protein isoform 2                                           | 0.524                                  | 0.559                                   | 0.594                                  | Transcription regulatory protein      |
| 49355765  | NP_115657.2    | ELAVL3      | 1995    | ELAV-like protein 3 isoform 2                                                         | 0.581                                  | 0.630                                   | 0.127                                  | RNA binding protein                   |
| 4506671   | NP_000995.1    | RPLP2       | 6181    | 60S acidic ribosomal protein P2                                                       | 0.633                                  | 0.673                                   | 0.575                                  | Ribosomal subunit                     |
| 223555917 | NP_848927.2    | MTDH        | 92140   | protein LYRIC                                                                         | 0.651                                  | 0.646                                   | 0.645                                  | Unclassified                          |
| 4759302   | NP_004729.1    | VAPB        | 9217    | vesicle-associated membrane protein-associated protein B/C isoform 1                  | 0.657                                  | 0.442                                   | 0.505                                  | Membrane transport protein            |
| 5174449   | NP_006017.1    | H1FX        | 8971    | histone H1x                                                                           | 1.653                                  | 2.438                                   | 1.889                                  | DNA binding protein                   |
| 5031877   | NP_005564.1    | LMNB1       | 4001    | lamin-B1 isoform 1                                                                    | 1.846                                  | 1.943                                   | 3.019                                  | Structural protein                    |
| 21536286  | NP_001814.2    | CKB         | 1152    | creatine kinase B-type                                                                | 1.867                                  | 1.610                                   | 0.665                                  | Enzyme: Phosphotransferase            |
| 4503183   | NP_001905.1    | CYB5A       | 1528    | cytochrome b5 isoform 2                                                               | 1.899                                  | 1.887                                   | 1.871                                  | Enzyme: Oxidoreductase                |
| 194688133 | NP_001124160.1 | HMGB2       | 3148    | high mobility group protein B2                                                        | 1.959                                  | 2.729                                   | 3.890                                  | Transcription regulatory protein      |
| 4504255   | NP_002097.1    | H2AFZ       | 3015    | histone H2A.Z                                                                         | 1.998                                  | 1.561                                   | 2.701                                  | DNA binding protein                   |
| 4885377   | NP_005311.1    | HIST1H1D    | 3007    | histone H1.3                                                                          | 2.183                                  | 4.208                                   | 7.321                                  | DNA binding protein                   |
| 217330646 | NP_006704.3    | SUB1        | 10923   | activated RNA polymerase II transcriptional coactivator p15                           | 2.200                                  | 1.505                                   | 1.642                                  | Transcription factor                  |
| 302129652 | NP_001180473.1 | ANXA6       | 309     | annexin A6 isoform 2                                                                  | 2.613                                  | 1.828                                   | 2.405                                  | Calcium binding protein               |
| 10800138  | NP_066407.1    | HIST1H2BD   | 3017    | histone H2B type 1-D                                                                  | 2.654                                  | 1.553                                   | 2.499                                  | DNA binding protein                   |
| 402534522 | NP_001257973.1 | NFIX        | 4784    | nuclear factor 1 X-type isoform 3                                                     | 2.655                                  | 1.906                                   | 1.590                                  | Transcription factor                  |
| 4502107   | NP_001145.1    | ANXA5       | 308     | annexin A5                                                                            | 2.695                                  | 2.263                                   | 2.963                                  | Calcium binding protein               |
| 4885381   | NP_005313.1    | HIST1H1B    | 3009    | histone H1.5                                                                          | 2.815                                  | 2.788                                   | 4.726                                  | DNA binding protein                   |
| 151101292 | NP_110382.3    | TMX1        | 81542   | thioredoxin-related transmembrane protein 1 precursor                                 | 2.917                                  | 2.209                                   | 1.511                                  | Enzyme: Oxidoreductase                |
| 4503979   | NP_002046.1    | GFAP        | 2670    | glial fibrillary acidic protein isoform 1                                             | 3.054                                  | 2.076                                   | 1.940                                  | Structural protein                    |
| 4502027   | NP_000468.1    | ALB         | 213     | serum albumin preproprotein                                                           | 3.103                                  | 1.887                                   | 2.684                                  | Transport/cargo protein               |
| 66529396  | NP_001018171.1 | PON2        | 5445    | serum paraoxonase/arylesterase 2 isoform 2                                            | 3.150                                  | 4.699                                   | 2.579                                  | Enzyme: Esterase                      |
| 10800140  | NP_066406.1    | HIST1H2BB   | 3018    | histone H2B type 1-B                                                                  | 3.463                                  | 1.755                                   | 2.666                                  | DNA binding protein                   |
| 4885375   | NP_005310.1    | HIST1H1C    | 3006    | histone H1.2                                                                          | 3.478                                  | 4.044                                   | 3.483                                  | DNA binding protein                   |
| 4504425   | NP_002119.1    | HMGB1       | 3146    | high mobility group protein B1                                                        | 3.679                                  | 2.634                                   | 3.346                                  | DNA binding protein                   |
| 4504313   | NP_003535.1    | HIST1H4B    | 8366    | histone H4                                                                            | 3.717                                  | 2.142                                   | 3.327                                  | DNA binding protein                   |
| 10800144  | NP_066544.1    | HIST1H2AJ   | 8331    | histone cluster 1, H2aj                                                               | 3.829                                  | 2.115                                   | 4.403                                  | DNA binding protein                   |

**Supplementary Table S9: Immunohistochemistry on tissue microarray for six differentially expressed proteins, NUCKS1, SMARCA5, PARP1, PTBP1, HMGB2, and NFIB, identified by quantitative mass spectrometric analysis.** Immunohistochemistry was performed using commercially available tissue microarrays (US BioMax) consisting of 4 control subjects, 13 diffuse astrocytomas (Grade II), 11 anaplastic astrocytomas (Grade III), and 27 glioblastoma (Grade IV) patients samples. Scoring criteria used were based on both staining intensities and distributions. Scores 0, +1, +2 and +3 indicate negative, low, medium and strong staining, respectively. The distribution of staining of cancer cells was scored as 0 (less than 5% of cells staining), 1+ (5–30% of cell staining), 2+ (31–60% of cells staining) and 3+ (greater than 60% of cells staining). TMA slides were evaluated independently by two neuropathologists.

| Sl. No | Proteins | Mass spectrometry analysis | Samples (n) used for IHC | IHC scores (Staining intensity) |    |    |    |
|--------|----------|----------------------------|--------------------------|---------------------------------|----|----|----|
|        |          |                            |                          | 0                               | 1+ | 2+ | 3+ |
| 1      | NUCKS1   | Grade II (Up)              | Grade II (13)            | 0                               | 0  | 0  | 13 |
|        |          | Grade III (Up)             | Grade III (11)           | 0                               | 0  | 0  | 11 |
|        |          | Grade IV (Up)              | Grade IV (27)            | 0                               | 1  | 0  | 26 |
|        |          | -                          | Control (4)              | 1                               | 2  | 1  | 0  |
| 2      | SMARCA5  | Grade II<br>No change      | Grade II (13)            | 0                               | 1  | 0  | 12 |
|        |          | Grade III<br>No change     | Grade III (11)           | 0                               | 0  | 0  | 11 |
|        |          | Grade IV (Up)              | Grade IV (27)            | 0                               | 1  | 0  | 26 |
|        |          | -                          | Control (4)              | 2                               | 1  | 1  | 0  |
| 3      | PARP1    | Grade II (Up)              | Grade II (13)            | 0                               | 1  | 0  | 12 |
|        |          | Grade III (Up)             | Grade III (11)           | 0                               | 2  | 0  | 9  |
|        |          | Grade IV<br>No change      | Grade IV (27)            | 1                               | 6  | 1  | 19 |
|        |          | -                          | Control (4)              | 0                               | 2  | 1  | 1  |
| 4      | PTBP1    | Grade II (Up)              | Grade II (13)            | 1                               | 3  | 0  | 9  |
|        |          | Grade III (Up)             | Grade III (11)           | 0                               | 0  | 0  | 11 |
|        |          | Grade IV<br>No change      | Grade IV (27)            | 2                               | 6  | 5  | 14 |
|        |          | -                          | Control (4)              | 3                               | 1  | 0  | 0  |
| 5      | HMGB2    | Grade II (Up)              | Grade II (13)            | 0                               | 1  | 1  | 11 |
|        |          | Grade III (Up)             | Grade III (11)           | 0                               | 2  | 3  | 6  |
|        |          | Grade IV (Up)              | Grade IV (27)            | 0                               | 9  | 4  | 14 |
|        |          | -                          | Control (4)              | 2                               | 1  | 1  | 0  |
| 6      | NFIB     | Grade II (Up)              | Grade II (13)            | 4                               | 4  | 1  | 4  |
|        |          | Grade III (Up)             | Grade III (11)           | 5                               | 2  | 3  | 1  |
|        |          | Grade IV (Up)              | Grade IV (27)            | 11                              | 5  | 2  | 9  |
|        |          | -                          | Control (4)              | 4                               | 0  | 0  | 0  |

**Supplementary Table S10: List of 61 concordant mRNA and protein target entities present in the transcription interaction network and their microRNA regulators.** The miRNA interaction were identified, as per pipeline shown in **Figure 5A** and described in the Methods, for mRNA and protein entities present in the transcription network as shown in **Figure 4**. Each of the miRNA-target interaction was supported by at least one PubMed ID.

| Gene Symbol   | Protein Fold change in our study | Transcript Fold change in GBM TCGA data | MicroRNA interactor | MIMATid      | MicroRNA Fold change in GBM data from TCGA |
|---------------|----------------------------------|-----------------------------------------|---------------------|--------------|--------------------------------------------|
| ADAR          | 0.51                             | 0.77                                    | hsa-miR-106a-5p     | MIMAT0000103 | 2.12                                       |
|               |                                  |                                         | hsa-miR-106b-5p     | MIMAT0000680 | 2.58                                       |
|               |                                  |                                         | hsa-miR-130b-3p     | MIMAT0000691 | 2.29                                       |
|               |                                  |                                         | hsa-miR-17-5p       | MIMAT0000070 | 1.99                                       |
|               |                                  |                                         | hsa-miR-20a-5p      | MIMAT0000075 | 2.23                                       |
|               |                                  |                                         | hsa-miR-20b-5p      | MIMAT0001413 | 1.59                                       |
|               |                                  |                                         | hsa-miR-27a-3p      | MIMAT0000084 | 3.40                                       |
|               |                                  |                                         | hsa-miR-93-5p       | MIMAT0000093 | 2.25                                       |
| BAZ1B         | 1.82                             | 2.27                                    | hsa-let-7e-5p       | MIMAT0000066 | 0.59                                       |
| BUD31         | 2.02                             | 1.57                                    | hsa-miR-218-5p      | MIMAT0000275 | 0.12                                       |
| BZW1          | 1.55                             | 1.36                                    | hsa-let-7d-5p       | MIMAT0000065 | 0.72                                       |
|               |                                  |                                         | hsa-let-7e-5p       | MIMAT0000066 | 0.59                                       |
|               |                                  |                                         | hsa-let-7g-5p       | MIMAT0000414 | 0.58                                       |
|               |                                  |                                         | hsa-miR-101-3p      | MIMAT0000099 | 0.45                                       |
|               |                                  |                                         | hsa-miR-136-5p      | MIMAT0000448 | 0.21                                       |
|               |                                  |                                         | hsa-miR-144-3p      | MIMAT0000436 | 0.78                                       |
|               |                                  |                                         | hsa-miR-323a-3p     | MIMAT0000755 | 0.42                                       |
|               |                                  |                                         | hsa-miR-376c-3p     | MIMAT0000720 | 0.79                                       |
|               |                                  |                                         | hsa-miR-582-5p      | MIMAT0003247 | 0.63                                       |
| hsa-miR-98-5p | MIMAT0000096                     | 0.75                                    |                     |              |                                            |
| CBX5          | 1.51                             | 1.78                                    | hsa-let-7d-5p       | MIMAT0000065 | 0.72                                       |
|               |                                  |                                         | hsa-let-7e-5p       | MIMAT0000066 | 0.59                                       |
|               |                                  |                                         | hsa-let-7g-5p       | MIMAT0000414 | 0.58                                       |
|               |                                  |                                         | hsa-miR-1-3p        | MIMAT0000416 | 0.79                                       |
|               |                                  |                                         | hsa-miR-98-5p       | MIMAT0000096 | 0.75                                       |
| CENPV         | 0.58                             | 0.56                                    | hsa-let-7b-5p       | MIMAT0000063 | 1.16                                       |
|               |                                  |                                         | hsa-miR-28-5p       | MIMAT0000085 | 1.19                                       |
| DDX17         | 0.53                             | 0.69                                    | hsa-let-7b-5p       | MIMAT0000063 | 1.16                                       |
|               |                                  |                                         | hsa-miR-106b-5p     | MIMAT0000680 | 2.58                                       |
|               |                                  |                                         | hsa-miR-142-3p      | MIMAT0000434 | 1.54                                       |
|               |                                  |                                         | hsa-miR-155-5p      | MIMAT0000646 | 2.52                                       |
|               |                                  |                                         | hsa-miR-92a-3p      | MIMAT0000092 | 2.69                                       |
| DDX27         | 1.73                             | 1.35                                    | hsa-miR-23b-3p      | MIMAT0000418 | 0.62                                       |
|               |                                  |                                         | hsa-let-7g-5p       | MIMAT0000414 | 0.58                                       |



|           |      |       |                 |              |       |
|-----------|------|-------|-----------------|--------------|-------|
| EEF1A1    | 1.95 | 1.40  | hsa-miR-125a-5p | MIMAT0000443 | 0.85  |
|           |      |       | hsa-miR-185-5p  | MIMAT0000455 | 0.79  |
|           |      |       | hsa-miR-221-3p  | MIMAT0000278 | 0.58  |
|           |      |       | hsa-miR-23b-3p  | MIMAT0000418 | 0.62  |
|           |      |       | hsa-miR-30e-5p  | MIMAT0000692 | 0.69  |
| ELAVL2    | 0.44 | 0.37  | hsa-miR-340-3p  | MIMAT0000750 | 0.61  |
|           |      |       | hsa-miR-106a-5p | MIMAT0000103 | 2.12  |
|           |      |       | hsa-miR-106b-5p | MIMAT0000680 | 2.58  |
|           |      |       | hsa-miR-17-5p   | MIMAT0000070 | 1.99  |
|           |      |       | hsa-miR-20a-5p  | MIMAT0000075 | 2.23  |
|           |      |       | hsa-miR-20b-5p  | MIMAT0001413 | 1.59  |
|           |      |       | hsa-miR-26b-5p  | MIMAT0000083 | 1.35  |
|           |      |       | hsa-miR-373-5p  | MIMAT0000725 | 1.46  |
|           |      |       | hsa-miR-500a-3p | MIMAT0002871 | 1.21  |
|           |      |       | hsa-miR-93-5p   | MIMAT0000093 | 2.25  |
| ELAVL3    | 0.13 | 0.28  | hsa-miR-26b-5p  | MIMAT0000083 | 1.35  |
|           |      |       | hsa-miR-296-5p  | MIMAT0000690 | 1.99  |
| ELAVL4    | 0.42 | 0.15  | hsa-miR-21-5p   | MIMAT0000076 | 15.50 |
|           |      |       | hsa-miR-373-5p  | MIMAT0000725 | 1.46  |
|           |      |       | hsa-miR-526b-5p | MIMAT0002835 | 1.30  |
| FBL       | 1.66 | 1.78  | hsa-miR-324-5p  | MIMAT0000761 | 0.58  |
| FUS       | 1.49 | 1.60  | hsa-miR-221-3p  | MIMAT0000278 | 0.58  |
|           |      |       | hsa-miR-331-3p  | MIMAT0000760 | 0.54  |
| H1FX      | 1.89 | 1.55  | hsa-miR-1-3p    | MIMAT0000416 | 0.79  |
| H2AFY     | 3.79 | 1.49  | hsa-miR-148b-3p | MIMAT0000759 | 0.82  |
| H2AFZ     | 2.70 | 1.84  | hsa-miR-148b-3p | MIMAT0000759 | 0.82  |
| HIST1H1B  | 4.73 | 13.30 | hsa-miR-1-3p    | MIMAT0000416 | 0.79  |
| HIST1H1C  | 3.48 | 2.65  | hsa-miR-27b-3p  | MIMAT0000419 | 0.56  |
|           |      |       | hsa-miR-98-5p   | MIMAT0000096 | 0.75  |
| HIST1H1E  | 1.81 | 1.89  | hsa-miR-331-3p  | MIMAT0000760 | 0.54  |
| HIST1H2BD | 2.50 | 1.39  | hsa-let-7d-5p   | MIMAT0000065 | 0.72  |
|           |      |       | hsa-let-7e-5p   | MIMAT0000066 | 0.59  |
|           |      |       | hsa-let-7g-5p   | MIMAT0000414 | 0.58  |
|           |      |       | hsa-miR-490-3p  | MIMAT0002806 | 0.72  |
|           |      |       | hsa-miR-98-5p   | MIMAT0000096 | 0.75  |
| HIST1H3F  | 7.32 | 4.79  | hsa-miR-299-5p  | MIMAT0002890 | 0.57  |
| HMGB1     | 3.35 | 1.56  | hsa-let-7e-5p   | MIMAT0000066 | 0.59  |
|           |      |       | hsa-let-7g-5p   | MIMAT0000414 | 0.58  |
|           |      |       | hsa-miR-129-5p  | MIMAT0000242 | 0.14  |
|           |      |       | hsa-miR-148b-3p | MIMAT0000759 | 0.82  |
|           |      |       | hsa-miR-218-5p  | MIMAT0000275 | 0.12  |
|           |      |       | hsa-miR-22-3p   | MIMAT0000077 | 0.70  |
| HMGB2     | 3.89 | 3.31  | hsa-miR-139-5p  | MIMAT0000250 | 0.08  |
|           |      |       | hsa-miR-218-5p  | MIMAT0000275 | 0.12  |
|           |      |       | hsa-miR-23b-3p  | MIMAT0000418 | 0.62  |
|           |      |       | hsa-miR-329-3p  | MIMAT0001629 | 0.55  |
|           |      |       | hsa-miR-33a-5p  | MIMAT0000091 | 0.34  |
|           |      |       | hsa-miR-381-3p  | MIMAT0000736 | 0.50  |
|           |      |       | hsa-miR-582-5p  | MIMAT0003247 | 0.63  |
| HMGN1     | 1.94 | 1.48  | hsa-miR-27b-3p  | MIMAT0000419 | 0.56  |
|           |      |       | hsa-miR-495-3p  | MIMAT0002817 | 0.73  |
|           |      |       | hsa-miR-101-3p  | MIMAT0000099 | 0.45  |
|           |      |       | hsa-miR-144-3p  | MIMAT0000436 | 0.78  |

|                 |              |      |                 |              |      |
|-----------------|--------------|------|-----------------|--------------|------|
| HNRNPAB         | 2.03         | 2.03 | hsa-miR-149-5p  | MIMAT0000450 | 0.31 |
|                 |              |      | hsa-miR-504-5p  | MIMAT0002875 | 0.68 |
|                 |              |      | hsa-miR-625-5p  | MIMAT0003294 | 0.81 |
| HNRNPC          | 1.46         | 2.98 | hsa-let-7e-5p   | MIMAT0000066 | 0.59 |
|                 |              |      | hsa-miR-342-3p  | MIMAT0000753 | 0.45 |
|                 |              |      | hsa-miR-485-3p  | MIMAT0002176 | 0.67 |
| HNRNPD          | 1.49         | 1.59 | hsa-miR-1-3p    | MIMAT0000416 | 0.79 |
|                 |              |      | hsa-miR-221-3p  | MIMAT0000278 | 0.58 |
|                 |              |      | hsa-miR-222-3p  | MIMAT0000279 | 0.43 |
| HNRNPM          | 1.49         | 1.72 | hsa-miR-191-5p  | MIMAT0000440 | 0.82 |
|                 |              |      | hsa-miR-29a-3p  | MIMAT0000086 | 0.57 |
|                 |              |      | hsa-miR-331-3p  | MIMAT0000760 | 0.54 |
| HNRNPR          | 1.65         | 1.61 | hsa-miR-203a-3p | MIMAT0000264 | 0.80 |
|                 |              |      | hsa-miR-409-3p  | MIMAT0001639 | 0.73 |
| KHDRBS3         | 0.20         | 0.67 | hsa-miR-192-5p  | MIMAT0000222 | 1.15 |
| KHSRP           | 2.15         | 1.36 | hsa-miR-149-5p  | MIMAT0000450 | 0.31 |
|                 |              |      | hsa-miR-185-5p  | MIMAT0000455 | 0.79 |
|                 |              |      | hsa-miR-221-3p  | MIMAT0000278 | 0.58 |
|                 |              |      | hsa-miR-27b-3p  | MIMAT0000419 | 0.56 |
|                 |              |      | hsa-miR-410-3p  | MIMAT0002171 | 0.22 |
| LMNB1           | 3.02         | 3.58 | hsa-miR-1-3p    | MIMAT0000416 | 0.79 |
|                 |              |      | hsa-miR-101-3p  | MIMAT0000099 | 0.45 |
|                 |              |      | hsa-miR-124-3p  | MIMAT0000422 | 0.03 |
|                 |              |      | hsa-miR-128-3p  | MIMAT0000424 | 0.22 |
|                 |              |      | hsa-miR-154-5p  | MIMAT0000452 | 0.69 |
|                 |              |      | hsa-miR-218-5p  | MIMAT0000275 | 0.12 |
|                 |              |      | hsa-miR-23b-3p  | MIMAT0000418 | 0.62 |
| MATR3           | 0.38         | 0.73 | hsa-miR-125b-5p | MIMAT0000423 | 1.34 |
|                 |              |      | hsa-miR-155-5p  | MIMAT0000646 | 2.52 |
|                 |              |      | hsa-miR-18a-5p  | MIMAT0000072 | 1.28 |
|                 |              |      | hsa-miR-24-3p   | MIMAT0000080 | 1.50 |
|                 |              |      | hsa-miR-26b-5p  | MIMAT0000083 | 1.35 |
|                 |              |      | hsa-miR-615-3p  | MIMAT0003283 | 1.26 |
|                 |              |      | hsa-miR-106a-5p | MIMAT0000103 | 2.12 |
| MECP2           | 0.46         | 0.77 | hsa-miR-106b-5p | MIMAT0000680 | 2.58 |
|                 |              |      | hsa-miR-155-5p  | MIMAT0000646 | 2.52 |
|                 |              |      | hsa-miR-17-5p   | MIMAT0000070 | 1.99 |
|                 |              |      | hsa-miR-195-5p  | MIMAT0000461 | 1.50 |
|                 |              |      | hsa-miR-199a-3p | MIMAT0000232 | 1.27 |
|                 |              |      | hsa-miR-19a-3p  | MIMAT0000073 | 1.61 |
|                 |              |      | hsa-miR-19b-3p  | MIMAT0000074 | 2.02 |
|                 |              |      | hsa-miR-20a-5p  | MIMAT0000075 | 2.23 |
|                 |              |      | hsa-miR-20b-5p  | MIMAT0001413 | 1.59 |
|                 |              |      | hsa-miR-527     | MIMAT0002862 | 1.43 |
|                 |              |      | hsa-miR-92a-3p  | MIMAT0000092 | 2.69 |
|                 |              |      | hsa-miR-93-5p   | MIMAT0000093 | 2.25 |
|                 |              |      | NFIB            | 1.41         | 1.42 |
| hsa-miR-301a-3p | MIMAT0000688 | 0.83 |                 |              |      |
| hsa-miR-331-3p  | MIMAT0000760 | 0.54 |                 |              |      |

|               |              |      |                 |              |       |
|---------------|--------------|------|-----------------|--------------|-------|
|               |              |      | hsa-miR-379-5p  | MIMAT0000733 | 0.29  |
|               |              |      | hsa-miR-491-5p  | MIMAT0002807 | 0.30  |
| NFIX          | 1.59         | 1.56 | hsa-miR-124-3p  | MIMAT0000422 | 0.03  |
|               |              |      | hsa-miR-149-5p  | MIMAT0000450 | 0.31  |
|               |              |      | hsa-miR-324-5p  | MIMAT0000761 | 0.58  |
| NHP2          | 1.51         | 1.30 | hsa-miR-218-5p  | MIMAT0000275 | 0.12  |
| NOLC1         | 0.58         | 0.71 | hsa-let-7b-5p   | MIMAT0000063 | 1.16  |
|               |              |      | hsa-miR-155-5p  | MIMAT0000646 | 2.52  |
|               |              |      | hsa-miR-195-5p  | MIMAT0000461 | 1.50  |
|               |              |      | hsa-miR-27a-3p  | MIMAT0000084 | 3.40  |
|               |              |      | hsa-miR-324-3p  | MIMAT0000762 | 1.79  |
|               |              |      | hsa-miR-513a-5p | MIMAT0002877 | 1.65  |
|               |              |      | hsa-miR-615-3p  | MIMAT0003283 | 1.26  |
| NT5E          | 1.79         | 1.54 | hsa-miR-1-3p    | MIMAT0000416 | 0.79  |
|               |              |      | hsa-miR-124-3p  | MIMAT0000422 | 0.03  |
| PARP1         | 1.93         | 1.54 | hsa-miR-128-3p  | MIMAT0000424 | 0.22  |
|               |              |      | hsa-miR-149-5p  | MIMAT0000450 | 0.31  |
|               |              |      | hsa-miR-301a-3p | MIMAT0000688 | 0.83  |
|               |              |      | hsa-miR-31-5p   | MIMAT0000089 | 0.81  |
|               |              |      | hsa-miR-379-5p  | MIMAT0000733 | 0.29  |
|               |              |      | hsa-miR-7-5p    | MIMAT0000252 | 0.11  |
| PBRM1         | 1.94         | 1.59 | hsa-miR-181c-5p | MIMAT0000258 | 0.73  |
|               |              |      | hsa-miR-30e-5p  | MIMAT0000692 | 0.69  |
| PRKDC         | 1.95         | 1.34 | hsa-miR-218-5p  | MIMAT0000275 | 0.12  |
| PSIP1         | 0.59         | 0.57 | hsa-miR-155-5p  | MIMAT0000646 | 2.52  |
|               |              |      | hsa-miR-193b-3p | MIMAT0002819 | 1.67  |
| PURA          | 0.15         | 0.62 | hsa-miR-106b-5p | MIMAT0000680 | 2.58  |
|               |              |      | hsa-miR-15a-5p  | MIMAT0000068 | 1.54  |
|               |              |      | hsa-miR-15b-5p  | MIMAT0000417 | 3.33  |
|               |              |      | hsa-miR-16-5p   | MIMAT0000069 | 2.29  |
|               |              |      | hsa-miR-192-5p  | MIMAT0000222 | 1.15  |
|               |              |      | hsa-miR-195-5p  | MIMAT0000461 | 1.50  |
|               |              |      | hsa-miR-20a-5p  | MIMAT0000075 | 2.23  |
|               |              |      | hsa-miR-21-5p   | MIMAT0000076 | 15.50 |
|               |              |      | hsa-miR-34b-5p  | MIMAT0000685 | 1.30  |
| hsa-miR-93-5p | MIMAT0000093 | 2.25 |                 |              |       |
| RBBP4         | 1.57         | 2.01 | hsa-let-7e-5p   | MIMAT0000066 | 0.59  |
|               |              |      | hsa-miR-128-3p  | MIMAT0000424 | 0.22  |
|               |              |      | hsa-miR-129-5p  | MIMAT0000242 | 0.14  |
|               |              |      | hsa-miR-324-5p  | MIMAT0000761 | 0.58  |
|               |              |      | hsa-miR-342-3p  | MIMAT0000753 | 0.45  |
| RBM8A         | 2.24         | 1.81 | hsa-let-7e-5p   | MIMAT0000066 | 0.59  |
|               |              |      | hsa-miR-136-5p  | MIMAT0000448 | 0.21  |
|               |              |      | hsa-miR-144-3p  | MIMAT0000436 | 0.78  |
|               |              |      | hsa-miR-148b-3p | MIMAT0000759 | 0.82  |
| RPS15         | 1.49         | 1.27 | hsa-miR-124-3p  | MIMAT0000422 | 0.03  |
| RPS27         | 1.77         | 1.32 | hsa-let-7e-5p   | MIMAT0000066 | 0.59  |
|               |              |      | hsa-miR-143-3p  | MIMAT0000435 | 0.58  |
|               |              |      | hsa-miR-331-3p  | MIMAT0000760 | 0.54  |

|         |      |      |                 |              |      |
|---------|------|------|-----------------|--------------|------|
| SFPQ    | 1.52 | 1.39 | hsa-miR-218-5p  | MIMAT0000275 | 0.12 |
|         |      |      | hsa-miR-26a-5p  | MIMAT0000082 | 0.76 |
|         |      |      | hsa-miR-29b-3p  | MIMAT0000100 | 0.26 |
|         |      |      | hsa-miR-331-3p  | MIMAT0000760 | 0.54 |
|         |      |      | hsa-miR-383-5p  | MIMAT0000738 | 0.49 |
| SMARCA5 | 1.95 | 2.54 | hsa-miR-101-3p  | MIMAT0000099 | 0.45 |
|         |      |      | hsa-miR-103a-3p | MIMAT0000101 | 0.64 |
|         |      |      | hsa-miR-107     | MIMAT0000104 | 0.50 |
| SNRPD2  | 2.01 | 1.37 | hsa-miR-144-3p  | MIMAT0000436 | 0.78 |
|         |      |      | hsa-miR-149-5p  | MIMAT0000450 | 0.31 |
| SNRPD3  | 1.75 | 1.58 | hsa-miR-124-3p  | MIMAT0000422 | 0.03 |
|         |      |      | hsa-miR-218-5p  | MIMAT0000275 | 0.12 |
|         |      |      | hsa-miR-330-3p  | MIMAT0000751 | 0.35 |
|         |      |      | hsa-miR-410-3p  | MIMAT0002171 | 0.22 |
|         |      |      | hsa-miR-490-3p  | MIMAT0002806 | 0.72 |
| SNRPE   | 1.77 | 1.90 | hsa-miR-137     | MIMAT0000429 | 0.09 |
| SON     | 1.56 | 1.34 | hsa-miR-103a-3p | MIMAT0000101 | 0.64 |
|         |      |      | hsa-miR-203a-3p | MIMAT0000264 | 0.80 |
|         |      |      | hsa-miR-222-3p  | MIMAT0000279 | 0.43 |
| SRSF1   | 1.87 | 1.46 | hsa-miR-103a-3p | MIMAT0000101 | 0.64 |
|         |      |      | hsa-miR-107     | MIMAT0000104 | 0.50 |
|         |      |      | hsa-miR-128-3p  | MIMAT0000424 | 0.22 |
|         |      |      | hsa-miR-149-5p  | MIMAT0000450 | 0.31 |
|         |      |      | hsa-miR-27b-3p  | MIMAT0000419 | 0.56 |
|         |      |      | hsa-miR-377-3p  | MIMAT0000730 | 0.29 |
|         |      |      | hsa-miR-7-5p    | MIMAT0000252 | 0.11 |
| SRSF9   | 1.72 | 1.40 | hsa-miR-1-3p    | MIMAT0000416 | 0.79 |
|         |      |      | hsa-miR-218-5p  | MIMAT0000275 | 0.12 |
| SSRP1   | 2.39 | 1.62 | hsa-miR-23b-3p  | MIMAT0000418 | 0.62 |
| SUB1    | 1.64 | 1.55 | hsa-let-7e-5p   | MIMAT0000066 | 0.59 |
|         |      |      | hsa-miR-101-3p  | MIMAT0000099 | 0.45 |
| XRCC5   | 1.68 | 2.40 | hsa-miR-331-3p  | MIMAT0000760 | 0.54 |
|         |      |      | hsa-miR-7-5p    | MIMAT0000252 | 0.11 |
|         |      |      | hsa-miR-124-3p  | MIMAT0000422 | 0.03 |
| YBX1    | 6.20 | 2.02 | hsa-miR-137     | MIMAT0000429 | 0.09 |
|         |      |      | hsa-miR-149-5p  | MIMAT0000450 | 0.31 |
|         |      |      | hsa-miR-29b-3p  | MIMAT0000100 | 0.26 |
|         |      |      | hsa-miR-379-5p  | MIMAT0000733 | 0.29 |

**Supplementary Table S11: Immunohistochemistry on tissue microarrays of GBM for YBX1 and its interacting proteins, EGFR, MAPK1, CD44, TNC, MMP13 and SOX2 identified by protein-protein network analysis.** Immunohistochemistry was performed using in-house prepared tissue microarrays consisting of 4 control subjects and 18 glioblastoma (Grade IV) patient samples. Scoring criteria used were based on both staining intensities and distributions. TMA slides were evaluated independently by two neuropathologists. The distribution of staining of cancer cells was scored as 0 (less than 5% of cells staining), 1+ (5–30% of cell staining), 2+ (31–60% of cells staining) and 3+ (greater than 60% of cells staining). Scores 0, +1, +2 and +3 indicate negative, low, medium and strong staining respectively.

| Gene Symbol | Subjects | Pathologist I |    |    |    | Pathologist II |                     | FINAL SCORING |          |
|-------------|----------|---------------|----|----|----|----------------|---------------------|---------------|----------|
|             |          | IHC Scoring   |    |    |    | IHC Scoring    |                     | Negative      | Positive |
|             |          | 0             | 1+ | 2+ | 3+ | Negative       | Positive (2+ or 3+) |               |          |
| YBX1        | GBM      | 0             | 0  | 1  | 17 | 0              | 18                  | 0             | 18       |
|             | Controls | 4             | 0  | 0  | 0  | 4              | 0                   | 4             | 0        |
| EGFR        | GBM      | 1             | 0  | 8  | 9  | 1              | 17                  | 1             | 17       |
|             | Controls | 4             | 0  | 0  | 0  | 4              | 0                   | 4             | 0        |
| MAPK1       | GBM      | 1             | 0  | 9  | 8  | 1              | 17                  | 1             | 17       |
|             | Controls | 1             | 3  | 0  | 0  | 4              | 0                   | 4             | 0        |
| CD44        | GBM      | 1             | 1  | 6  | 10 | 2              | 16                  | 2             | 16       |
|             | Controls | 4             | 0  | 0  | 0  | 4              | 0                   | 4             | 0        |
| TNC         | GBM      | 6             | 0  | 6  | 6  | 6              | 12                  | 6             | 12       |
|             | Controls | 4             | 0  | 0  | 0  | 4              | 0                   | 4             | 0        |
| MMP13       | GBM      | 2             | 0  | 11 | 5  | 2              | 16                  | 2             | 16       |
|             | Controls | 4             | 0  | 0  | 0  | 4              | 0                   | 4             | 0        |
| SOX2        | GBM      | 0             | 0  | 1  | 17 | 0              | 18                  | 0             | 18       |
|             | Controls | 4             | 0  | 0  | 0  | 4              | 0                   | 4             | 0        |

**Supplementary Table S12:** List of selected differentially expressed transcription regulatory proteins identified in the study and their role in tumorigenesis.

| <b>Protein</b> | <b>Expression status<br/>Up / Down<br/>(Gr II, III,<br/>IV)*</b> | <b>Molecular function</b>                                   | <b>Molecular mechanism</b>                                                                                                              | <b>Role in cancer</b>                                                                                                         | <b>Ref.</b> |
|----------------|------------------------------------------------------------------|-------------------------------------------------------------|-----------------------------------------------------------------------------------------------------------------------------------------|-------------------------------------------------------------------------------------------------------------------------------|-------------|
| <i>HMGA1</i>   | Up in Gr III                                                     | DNA binding protein with chromatin remodelling activity     | HMGA1 expression correlates with Ki-67, MMP-9, and VEGF-A; The downstream targets include COX2 and STAT3, involved in tumor progression | regulator of cell invasion and metastasis, potential therapeutic target                                                       | [1-5]       |
| <i>HMGB1</i>   | Up in Gr II, III, IV                                             | DNA binding protein with chromatin remodelling activity     | HMGB1 promotes autophagy with low p53 expression and leads to tumor cell survival                                                       | promotes autophagy and tumor cell survival, correlated to shorter overall survival and linked to chemoresistance in GBM cells | [6-10]      |
| <i>HMGB2</i>   | Up in Gr II, III, IV                                             | DNA binding protein with chromatin remodelling activity     | HMGB2 affects cell invasion by altering expression of p53 and MMP2/ TIMP2                                                               | involved in cell invasion activity, prognostic factor and therapeutic target for GBM                                          | [7]         |
| <i>NUCKS1</i>  | Up in Gr II, III;<br><b>novel to gliomas</b>                     | DNA binding protein involved in DNA damage repair           | NUCKS1 repairs DNA double-strand breaks by homologous recombination                                                                     | having a role in tumor progression, prognostic factor                                                                         | [11, 12]    |
| <i>SMARCA5</i> | Up in Gr IV                                                      | Helicase and ATPase activity and regulates transcription by | Knockdown of SMARCA5-arrested cell cycle. Analysis of                                                                                   | overexpression of SMARCA5 correlates with increased cell                                                                      | [13, 14]    |

|             |                        |                                                                                    |                                                                                                                                                                                                          |                                                                                                                                                                             |          |
|-------------|------------------------|------------------------------------------------------------------------------------|----------------------------------------------------------------------------------------------------------------------------------------------------------------------------------------------------------|-----------------------------------------------------------------------------------------------------------------------------------------------------------------------------|----------|
|             |                        | altering chromatin structure                                                       | cell cycle and invasion-related molecules showed that SMARCA5 downregulated cyclin A, MMP2 expression and upregulated p21 expression                                                                     | proliferation, invasion and chemo resistance in glioma, potential therapeutic target                                                                                        |          |
| <i>TFAM</i> | Up in Gr II, III       | Transcription factor for mitochondrial DNA replication, transcription              | TFAM is involved in the activity of PI3K/Akt signaling pathway for cell proliferation. In addition, cell migration and invasion activity-related MMP2 and MMP9, is increased with overexpression of TFAM | involved in increased malignancy of glioma, promising target for therapeutics                                                                                               | [15, 16] |
| <i>NF1B</i> | Up in Gr II, III, IV   | Transcription factor, promotes differentiation of astrocytes                       | NF1B is involved in STAT3 signaling in classical and mesenchymal GBM cells                                                                                                                               | GBM sub-type specific tumor suppressor, associated with improved survival in GBM                                                                                            | [17]     |
| <i>NF1X</i> | Up in Gr II, III, IV   | Transcription factor, important for activation of GFAP transcription in astrocytes | NF1X regulates the expression of GFAP, an astrocyte marker protein                                                                                                                                       | implicated in glioma                                                                                                                                                        | [18]     |
| <i>PURA</i> | Down in Gr II, III, IV | Transcription factor, implicated in progression of cell cycle                      | PURA binds to hypophosphorylated form of the retinoblastoma protein, pRb, a regulator of S-phase initiation                                                                                              | ectopic overexpression of PURA suppress tumor cell proliferation in GBM cells, potential use of this protein and its derivative(s) in blocking proliferation of tumor cells | [19]     |

|              |                                         |                                                                                                                                                     |                                                                                                                                                                                                                                                               |                                                                                                                                                                                            |         |
|--------------|-----------------------------------------|-----------------------------------------------------------------------------------------------------------------------------------------------------|---------------------------------------------------------------------------------------------------------------------------------------------------------------------------------------------------------------------------------------------------------------|--------------------------------------------------------------------------------------------------------------------------------------------------------------------------------------------|---------|
| <i>SON</i>   | Up in Gr IV;<br><b>novel to gliomas</b> | Transcription factor, involved in mRNA splicing and having a role in mitotic spindle pole separation, chromosome alignment and microtubule dynamics | SON regulates RNA splicing for effective cell cycle progression and genome stability; Knockdown of SON leads to splicing defects in transcripts containing weak splice sites, and many genes necessary for cell-cycle progression and epigenetic modification | regulates genes involved in cell cycle progression and DNA repair, Potential therapeutic target                                                                                            | [20]    |
| <i>SUB1</i>  | Up in Gr II, III, IV                    | Transcription factor, ssDNA-binding protein involved in DNA replication, repair and heterochromatinization                                          | SUB1 binds to promoter regions of several oncogenes such as PLK1 (Polo-like kinase 1), C-MYC, serine-threonine kinase BUB1B and regulates their expression                                                                                                    | Elevated PC4 expression is strongly correlated with the progression of astrocytoma; Role in cell proliferation, invasion and migration; Potential prognostic marker and therapeutic target | [21-23] |
| <i>SSRP1</i> | Up in Gr II                             | Transcription factor, involved in chromatin remodeling                                                                                              | SSRP1 is a subunit of the FACT (Facilitates Chromatin Transcription) complex involved in chromatin remodeling                                                                                                                                                 | Involved in maintenance of pluripotent cell state; Role in cell proliferation, invasion and migration in GBM cells; Predictive marker for disease progression and therapeutic target       | [24-26] |
| <i>PTBPI</i> | Up in Gr II, III                        | RNA-binding protein and a major repressive regulator of alternative splicing, causing exon skipping in numerous alternatively spliced pre-mRNAs     | PTBPI is involved in tumorigenesis through an aberrant alternate splicing of several genes involved in cell proliferation (FGFR1, FGFR2), invasion                                                                                                            | Role in cell proliferation and migration in glioma; Potential therapeutic target                                                                                                           | [27-29] |



|  |  |  |                                                                                         |  |  |
|--|--|--|-----------------------------------------------------------------------------------------|--|--|
|  |  |  | (CSRC), motility (ACTN, FBN), apoptosis (FAS, CASP2), and multi-drug resistance (ABCC1) |  |  |
|--|--|--|-----------------------------------------------------------------------------------------|--|--|

\*if fold change for a grade is not shown in column 2, it implies differential expression was not observed

## References

1. Shah SN and Resar LM. High mobility group A1 and cancer: potential biomarker and therapeutic target. *Histology and histopathology*. 2012; 27(5):567-579.
2. Pang B, Fan H, Zhang IY, Liu B, Feng B, Meng L, Zhang R, Sadeghi S, Guo H and Pang Q. HMGA1 expression in human gliomas and its correlation with tumor proliferation, invasion and angiogenesis. *Journal of neuro-oncology*. 2012; 106(3):543-549.
3. Donato G, Martinez Hoyos J, Amorosi A, Maltese L, Lavano A, Volpentesta G, Signorelli F, Pentimalli F, Pallante P, Ferraro G, Tucci L, Signorelli CD, Viglietto G and Fusco A. High mobility group A1 expression correlates with the histological grade of human glial tumors. *Oncology reports*. 2004; 11(6):1209-1213.
4. Huso TH and Resar LM. The high mobility group A1 molecular switch: turning on cancer - can we turn it off? Expert opinion on therapeutic targets. 2014; 18(5):541-553.
5. Hillion J, Smail SS, Di Cello F, Belton A, Shah SN, Huso T, Schuldenfrei A, Nelson DM, Cope L, Campbell N, Karikari C, Aderinto A, Maitra A, Huso DL and Resar LM. The HMGA1-COX-2 axis: a key molecular pathway and potential target in pancreatic adenocarcinoma. *Pancreatology*. 2012; 12(4):372-379.
6. Wang XJ, Zhou SL, Fu XD, Zhang YY, Liang B, Shou JX, Wang JY and Ma J. Clinical and prognostic significance of high-mobility group box-1 in human gliomas. *Experimental and therapeutic medicine*. 2015; 9(2):513-518.
7. Wu ZB, Cai L, Lin SJ, Xiong ZK, Lu JL, Mao Y, Yao Y and Zhou LF. High-mobility group box 2 is associated with prognosis of glioblastoma by promoting cell viability, invasion, and chemotherapeutic resistance. *Neuro-oncology*. 2013; 15(9):1264-1275.
8. Livesey KM, Kang R, Vernon P, Buchser W, Loughran P, Watkins SC, Zhang L, Manfredi JJ, Zeh HJ, 3rd, Li L, Lotze MT and Tang D. p53/HMGB1 complexes regulate autophagy and apoptosis. *Cancer research*. 2012; 72(8):1996-2005.
9. Tang D, Kang R, Zeh HJ, 3rd and Lotze MT. High-mobility group box 1 and cancer. *Biochimica et biophysica acta*. 2010; 1799(1-2):131-140.

10. Stros M, Ozaki T, Bacikova A, Kageyama H and Nakagawara A. HMGB1 and HMGB2 cell-specifically down-regulate the p53- and p73-dependent sequence-specific transactivation from the human Bax gene promoter. *The Journal of biological chemistry*. 2002; 277(9):7157-7164.
11. Schaner ME, Ross DT, Ciaravino G, Sorlie T, Troyanskaya O, Diehn M, Wang YC, Duran GE, Sikic TL, Caldeira S, Skomedal H, Tu IP, Hernandez-Boussard T, Johnson SW, O'Dwyer PJ, Fero MJ, et al. Gene expression patterns in ovarian carcinomas. *Molecular biology of the cell*. 2003; 14(11):4376-4386.
12. Ziolkowski P, Gamian E, Osiecka B, Zougman A and Wisniewski JR. Immunohistochemical and proteomic evaluation of nuclear ubiquitous casein and cyclin-dependent kinases substrate in invasive ductal carcinoma of the breast. *Journal of biomedicine & biotechnology*. 2009; 2009:919645.
13. Zhao XC, An P, Wu XY, Zhang LM, Long B, Tian Y, Chi XY and Tong DY. Overexpression of hSNF2H in glioma promotes cell proliferation, invasion, and chemoresistance through its interaction with Rsf-1. *Tumour biology : the journal of the International Society for Oncodevelopmental Biology and Medicine*. 2016; 37(6):7203-7212.
14. Jin Q, Mao X, Li B, Guan S, Yao F and Jin F. Overexpression of SMARCA5 correlates with cell proliferation and migration in breast cancer. *Tumour biology : the journal of the International Society for Oncodevelopmental Biology and Medicine*. 2015; 36(3):1895-1902.
15. Lee H, Park J, Tran Q, Kim D, Hong Y, Cho H, Kwon SH, Brazil D, Kim SH and Park J. Mitochondrial transcription factor A (TFAM) is upregulated in glioma. *Molecular medicine reports*. 2017; 15(6):3781-3786.
16. Jiang J, Yang J, Wang Z, Wu G and Liu F. TFAM is directly regulated by miR-23b in glioma. *Oncology reports*. 2013; 30(5):2105-2110.
17. Stringer BW, Bunt J, Day BW, Barry G, Jamieson PR, Ensbey KS, Bruce ZC, Goasdoue K, Vidal H, Charmsaz S, Smith FM, Cooper LT, Piper M, Boyd AW and Richards LJ. Nuclear factor one B (NFIB) encodes a subtype-specific tumour suppressor in glioblastoma. *Oncotarget*. 2016; 7(20):29306-29320.
18. Gopalan SM, Wilczynska KM, Konik BS, Bryan L and Kordula T. Nuclear factor-1-X regulates astrocyte-specific expression of the alpha1-antichymotrypsin and glial fibrillary acidic protein genes. *The Journal of biological chemistry*. 2006; 281(19):13126-13133.
19. Darbinian N, Gallia GL, King J, Del Valle L, Johnson EM and Khalili K. Growth inhibition of glioblastoma cells by human Pur(alpha). *Journal of cellular physiology*. 2001; 189(3):334-340.
20. Ahn EY, DeKelver RC, Lo MC, Nguyen TA, Matsuura S, Boyapati A, Pandit S, Fu XD and Zhang DE. SON controls cell-cycle progression by coordinated regulation of RNA splicing. *Molecular cell*. 2011; 42(2):185-198.

21. Chakravarthi BV, Goswami MT, Pathi SS, Robinson AD, Cieslik M, Chandrashekar DS, Agarwal S, Siddiqui J, Daignault S, Carskadon SL, Jing X, Chinnaiyan AM, Kunju LP, Palanisamy N and Varambally S. MicroRNA-101 regulated transcriptional modulator SUB1 plays a role in prostate cancer. *Oncogene*. 2016; 35(49):6330-6340.
22. Conesa C and Acker J. Sub1/PC4 a chromatin associated protein with multiple functions in transcription. *RNA biology*. 2010; 7(3):287-290.
23. Chen L, Du C, Wang L, Yang C, Zhang JR, Li N, Li Y, Xie XD and Gao GD. Human positive coactivator 4 (PC4) is involved in the progression and prognosis of astrocytoma. *Journal of the neurological sciences*. 2014; 346(1-2):293-298.
24. Dermawan JK, Hitomi M, Silver DJ, Wu Q, Sandlesh P, Sloan AE, Purmal AA, Gurova KV, Rich JN, Lathia JD, Stark GR and Venere M. Pharmacological Targeting of the Histone Chaperone Complex FACT Preferentially Eliminates Glioblastoma Stem Cells and Prolongs Survival in Preclinical Models. *Cancer research*. 2016; 76(8):2432-2442.
25. Liao J, Tao X, Ding Q, Liu J, Yang X, Yuan FE, Yang JA, Liu B, Xiang GA and Chen Q. SSRP1 silencing inhibits the proliferation and malignancy of human glioma cells via the MAPK signaling pathway. *Oncology reports*. 2017; 38(5):2667-2676.
26. Fleyshman D, Prendergast L, Safina A, Paszkiewicz G, Commane M, Morgan K, Attwood K and Gurova K. Level of FACT defines the transcriptional landscape and aggressive phenotype of breast cancer cells. *Oncotarget*. 2017; 8(13):20525-20542.
27. Cheung HC, Hai T, Zhu W, Baggerly KA, Tsavachidis S, Krahe R and Cote GJ. Splicing factors PTBP1 and PTBP2 promote proliferation and migration of glioma cell lines. *Brain : a journal of neurology*. 2009; 132(Pt 8):2277-2288.
28. Wang ZN, Liu D, Yin B, Ju WY, Qiu HZ, Xiao Y, Chen YJ, Peng XZ and Lu CM. High expression of PTBP1 promote invasion of colorectal cancer by alternative splicing of cortactin. *Oncotarget*. 2017; 8(22):36185-36202.
29. Takahashi H, Nishimura J, Kagawa Y, Kano Y, Takahashi Y, Wu X, Hiraki M, Hamabe A, Konno M, Haraguchi N, Takemasa I, Mizushima T, Ishii M, Mimori K, Ishii H, Doki Y, et al. Significance of Polypyrimidine Tract-Binding Protein 1 Expression in Colorectal Cancer. *Molecular cancer therapeutics*. 2015; 14(7):1705-1716.
